# Supplementary material for: Proteinase 3 depletion attenuates leukemia by promoting myeloid differentiation
Source: PubMed Central journal article supplement (PMC11165011; doi:10.1038/s41418-024-01288-4), 2024-04-08

Figure 1

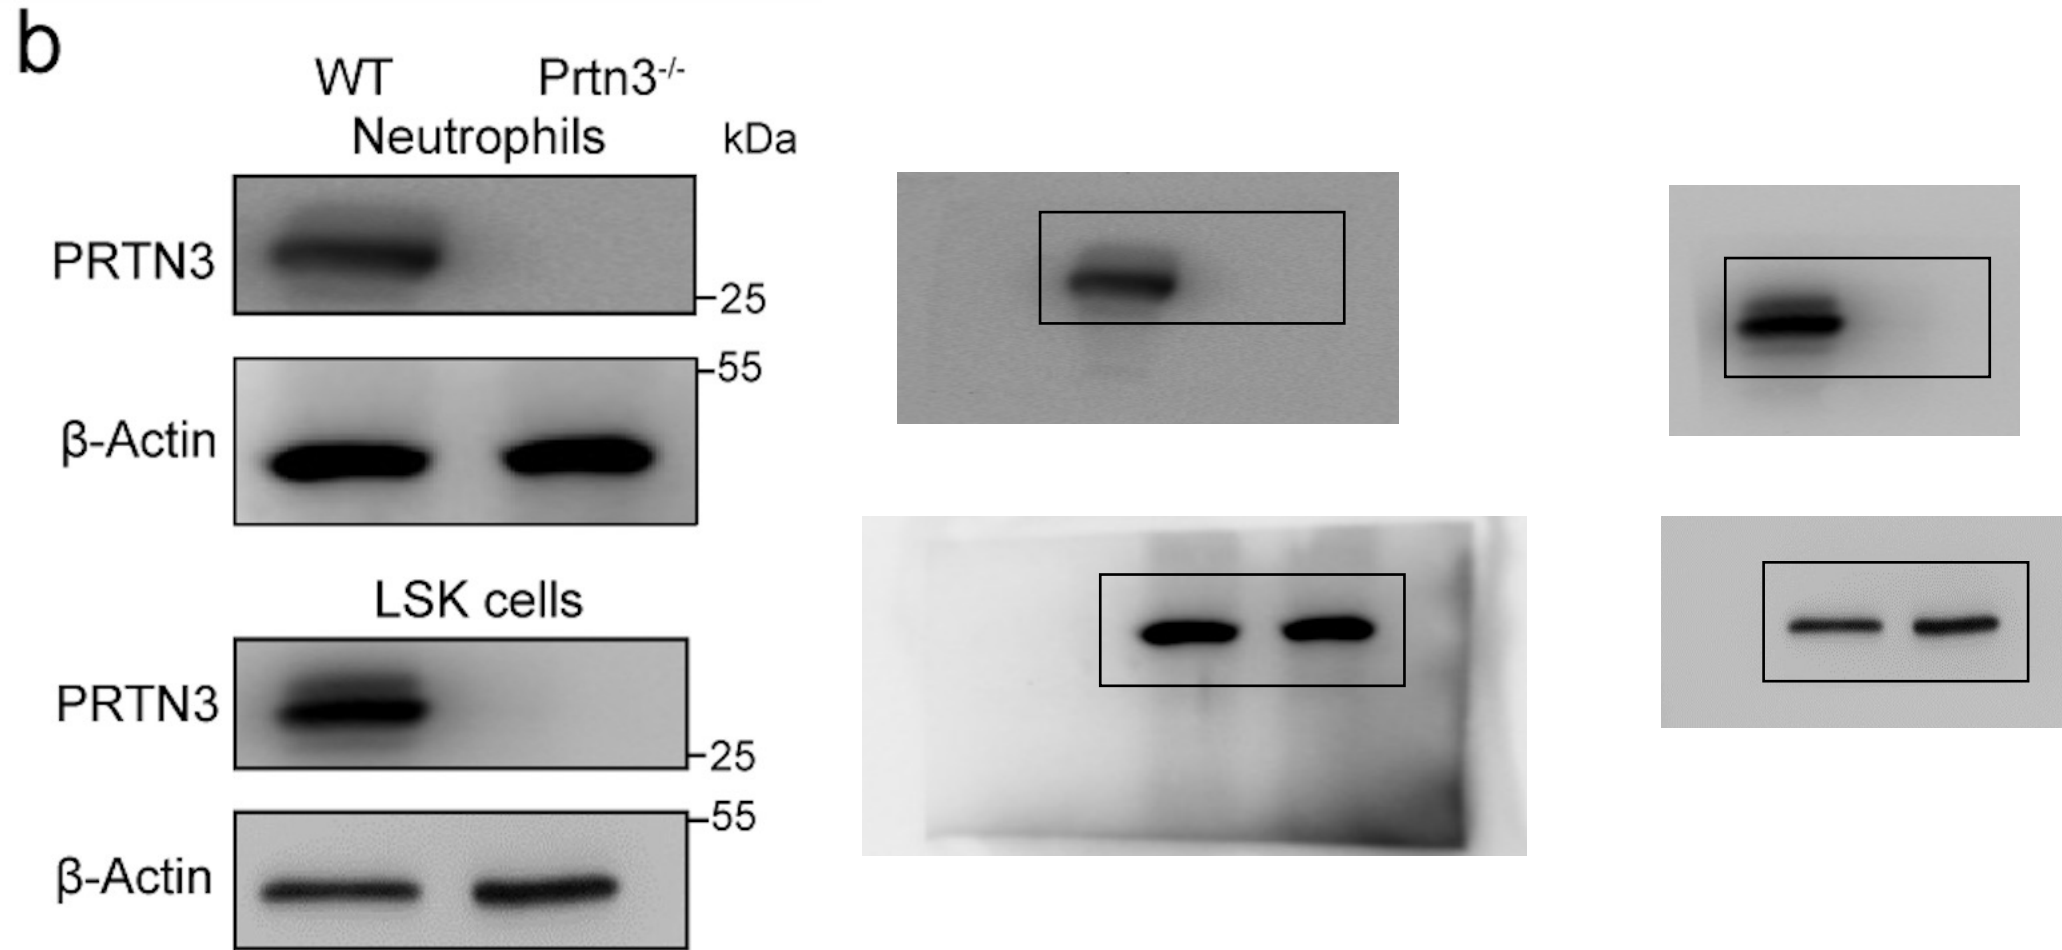

Figure 2

a

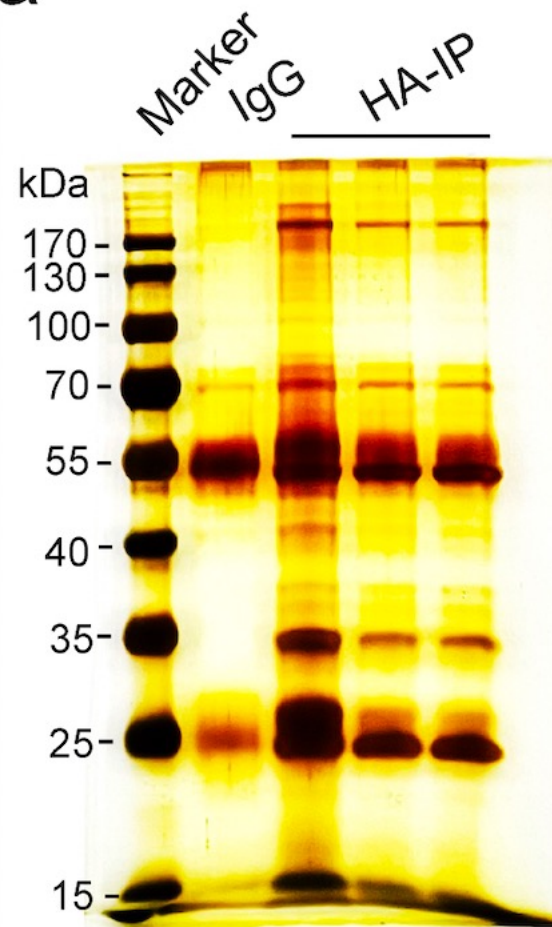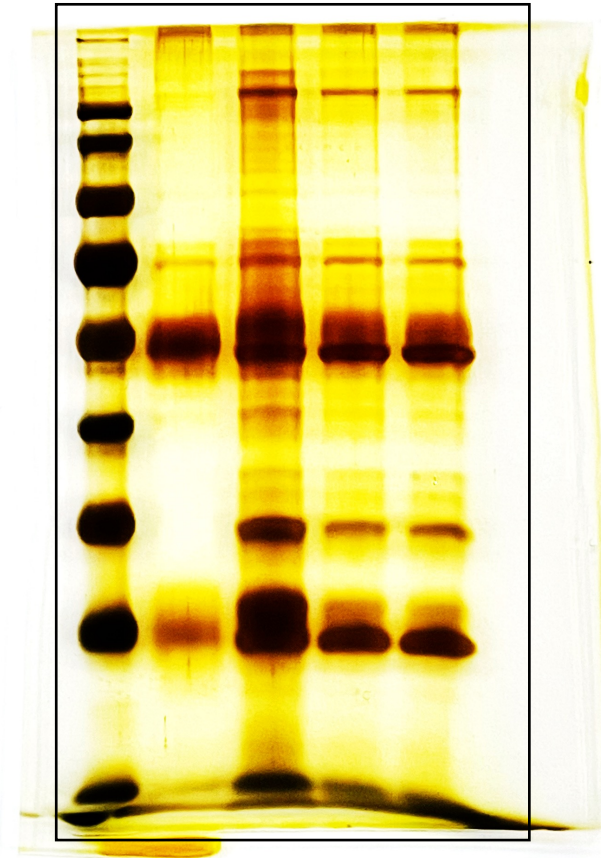

Figure 2

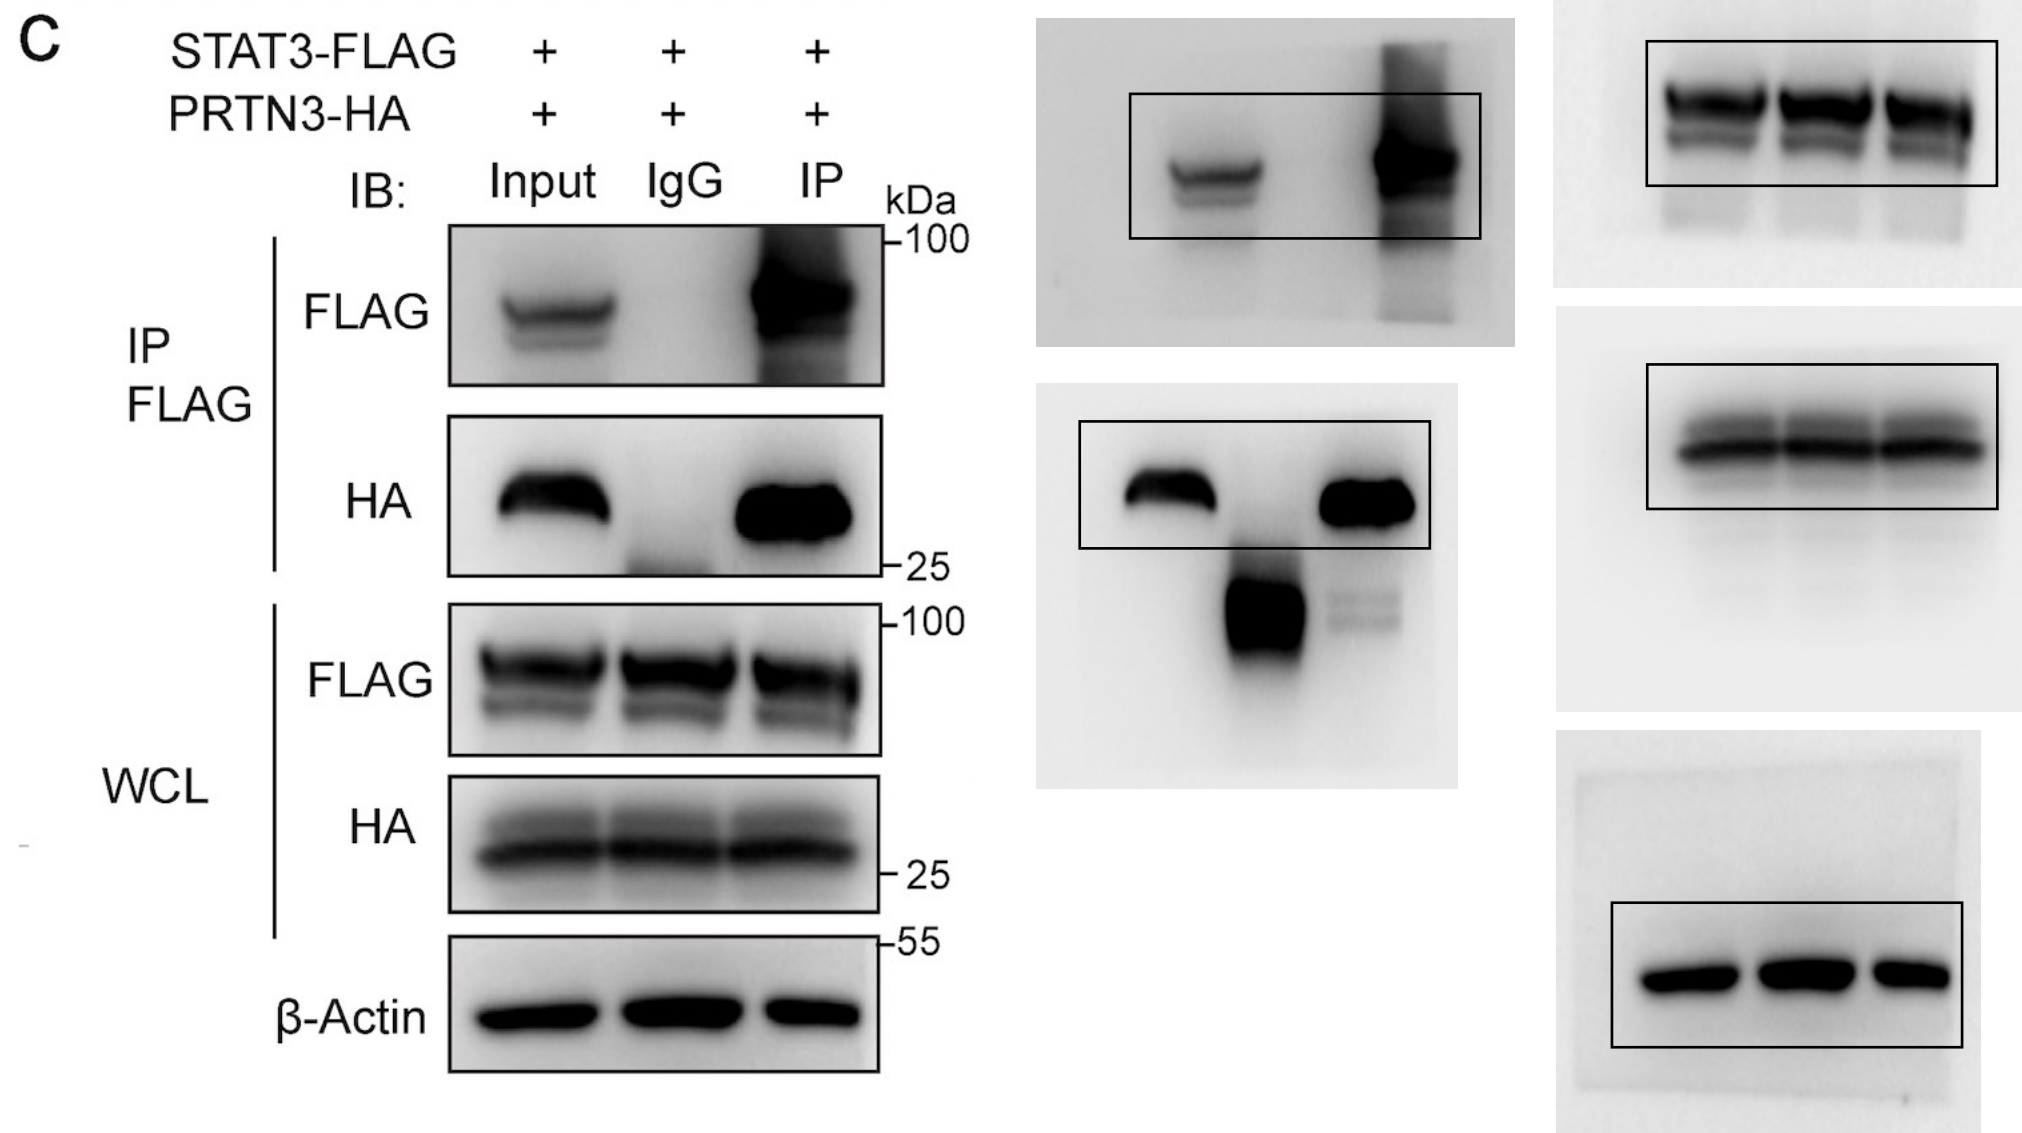

Figure 2

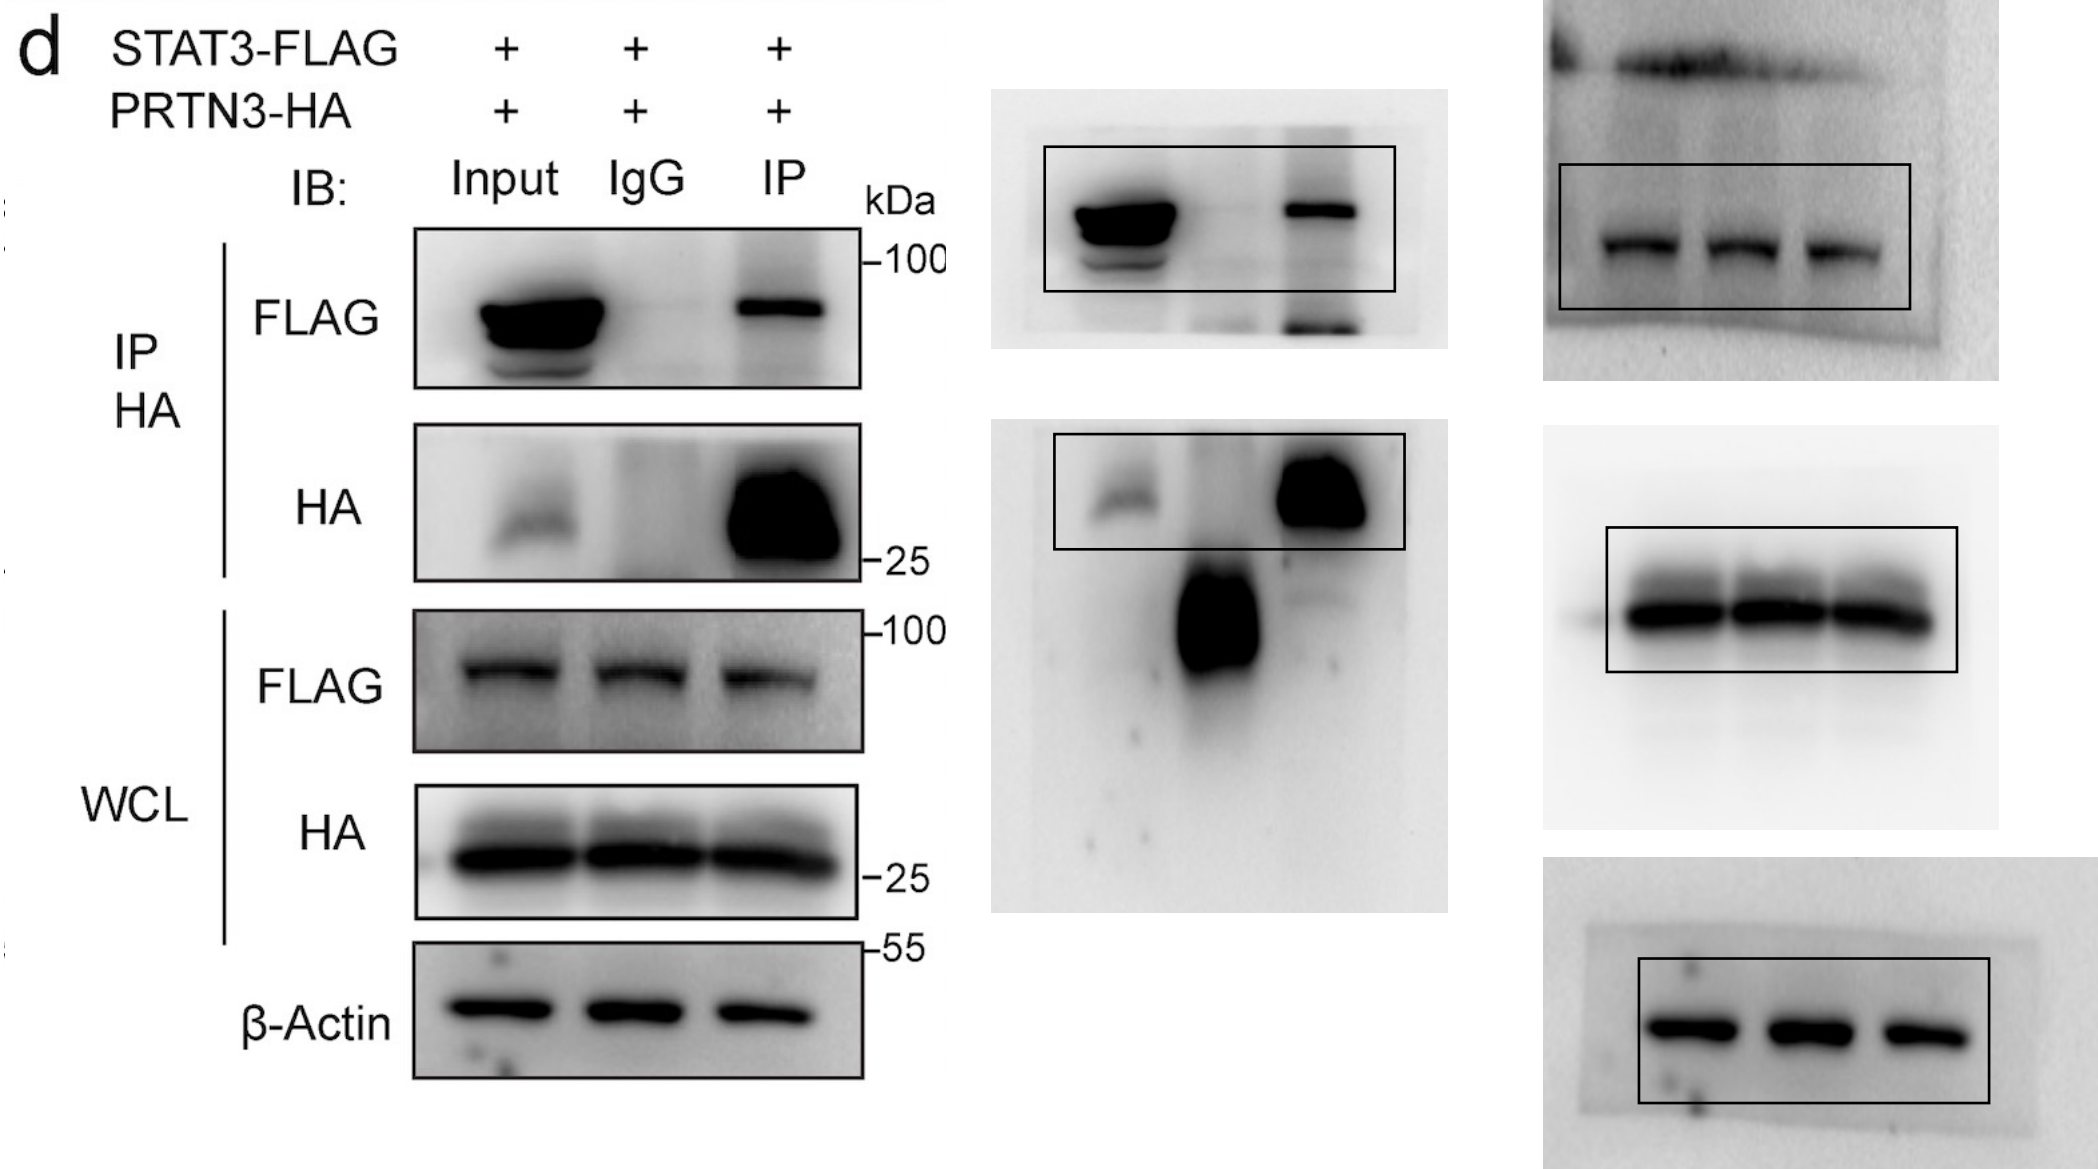

Figure 2

**f**

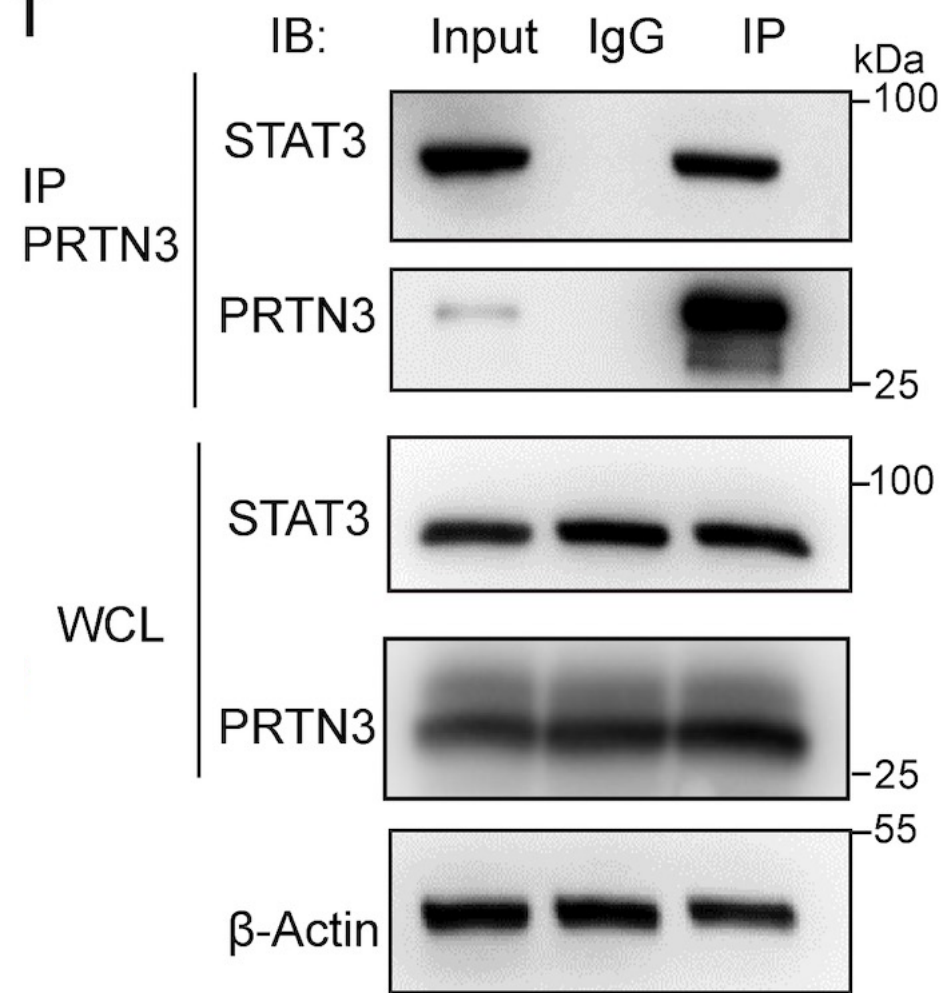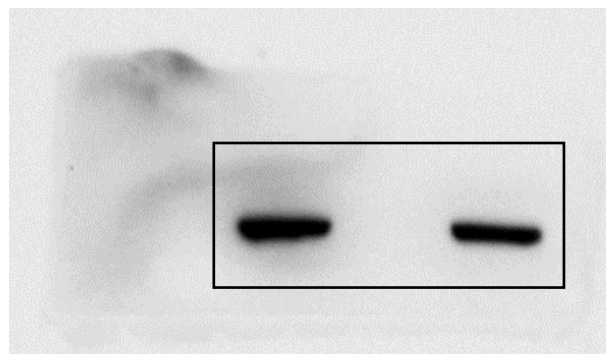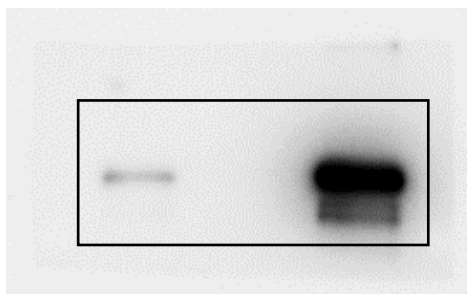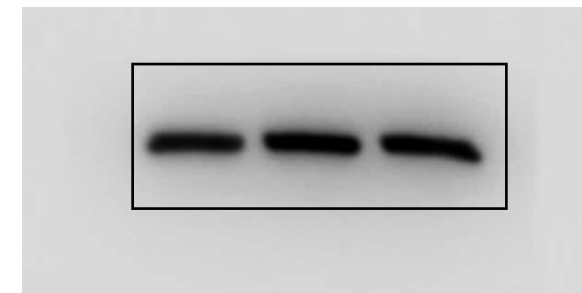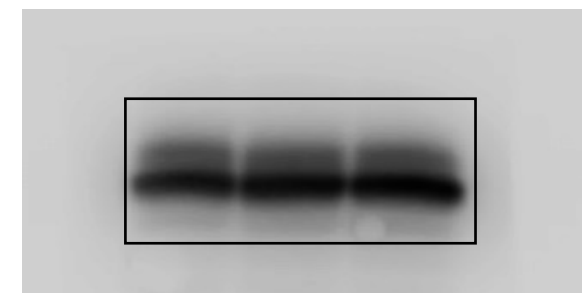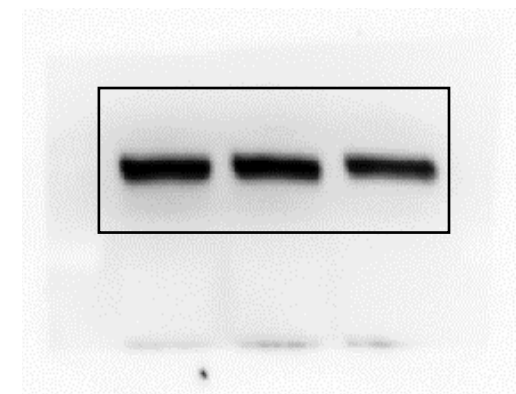

Figure 2

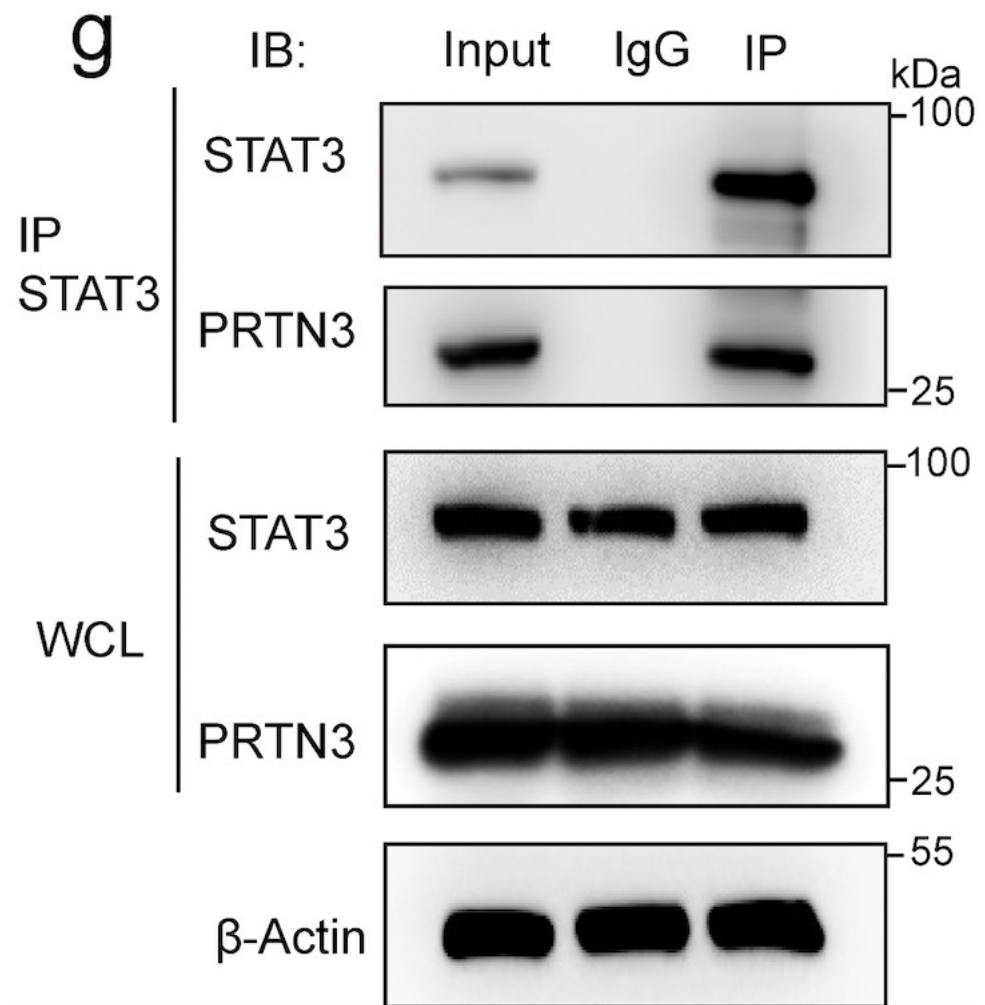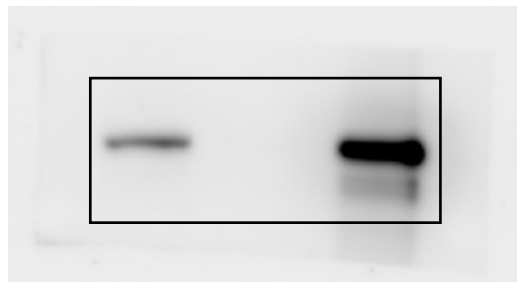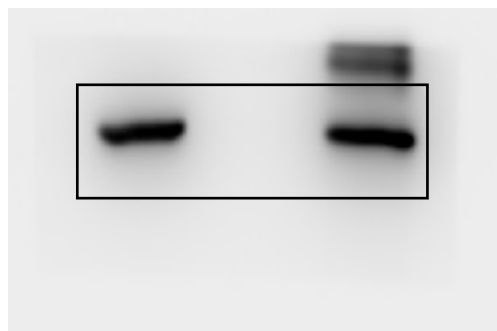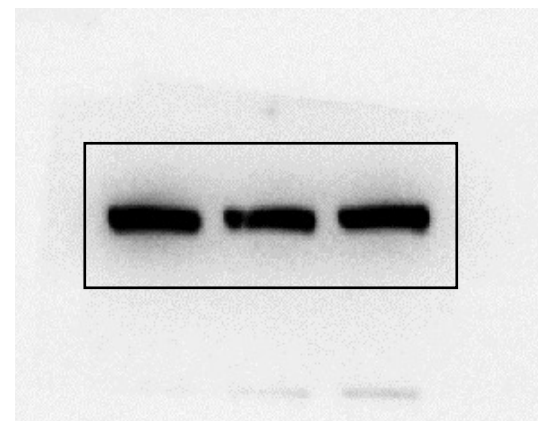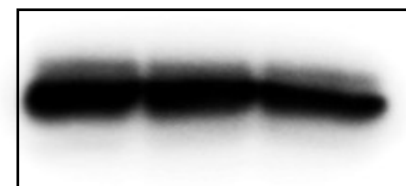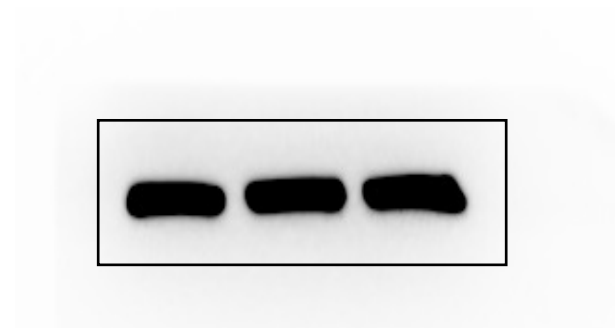

# Figure 3

C

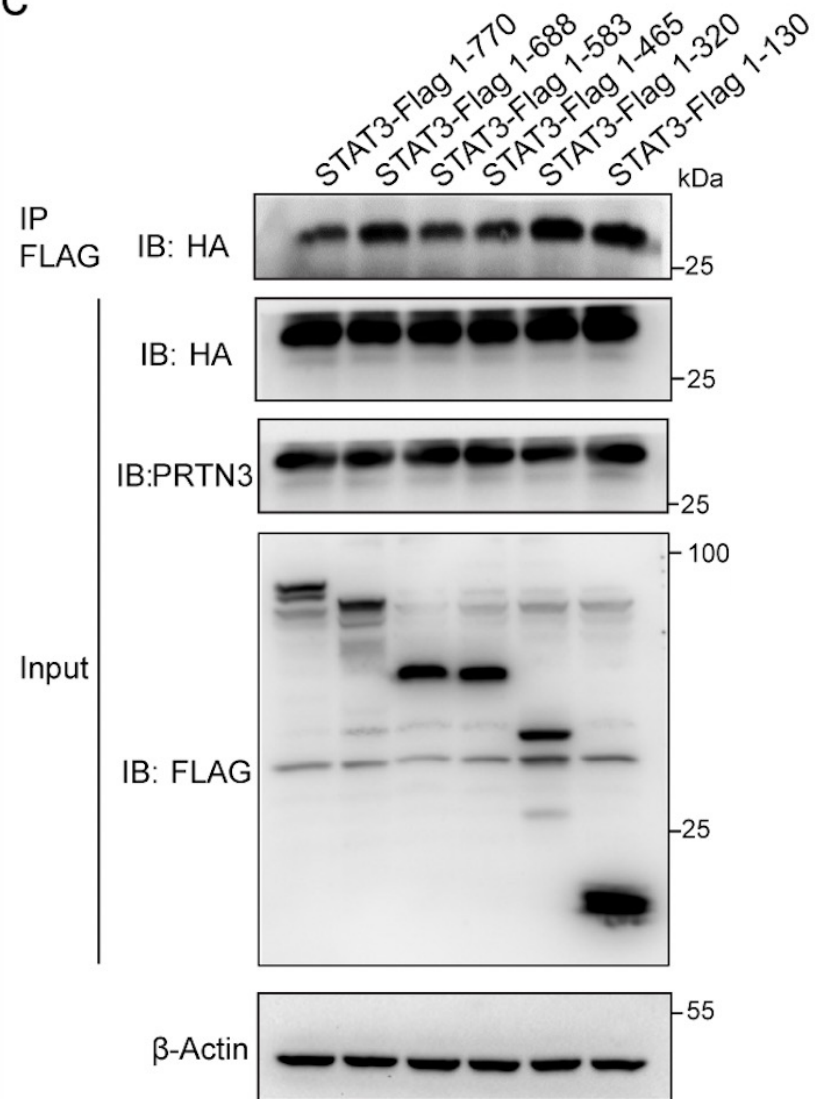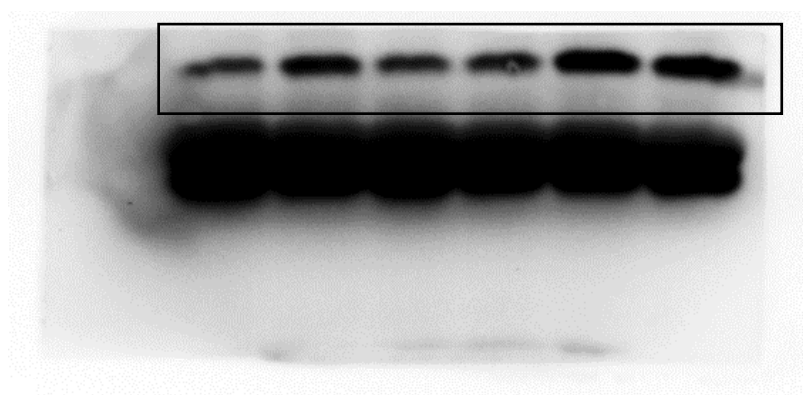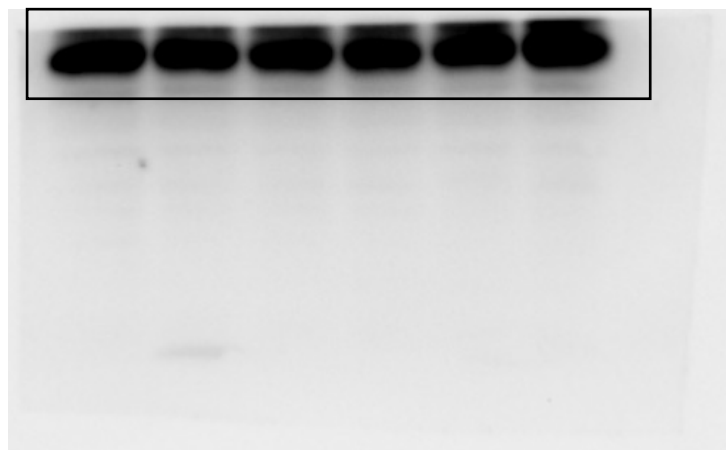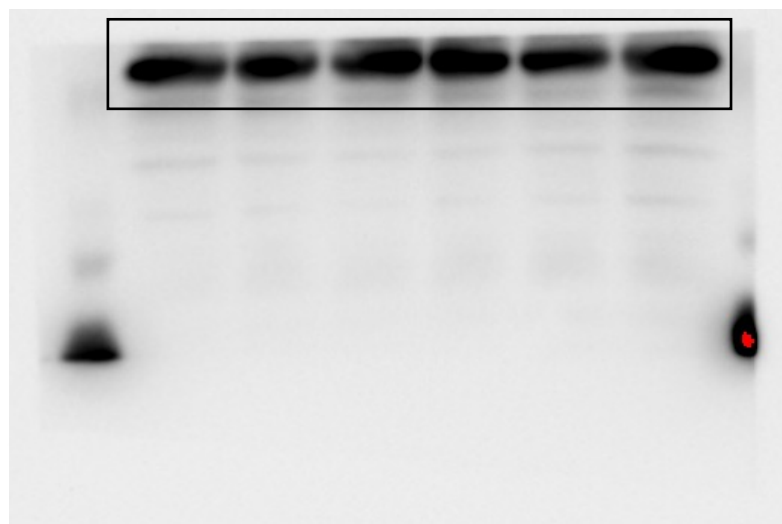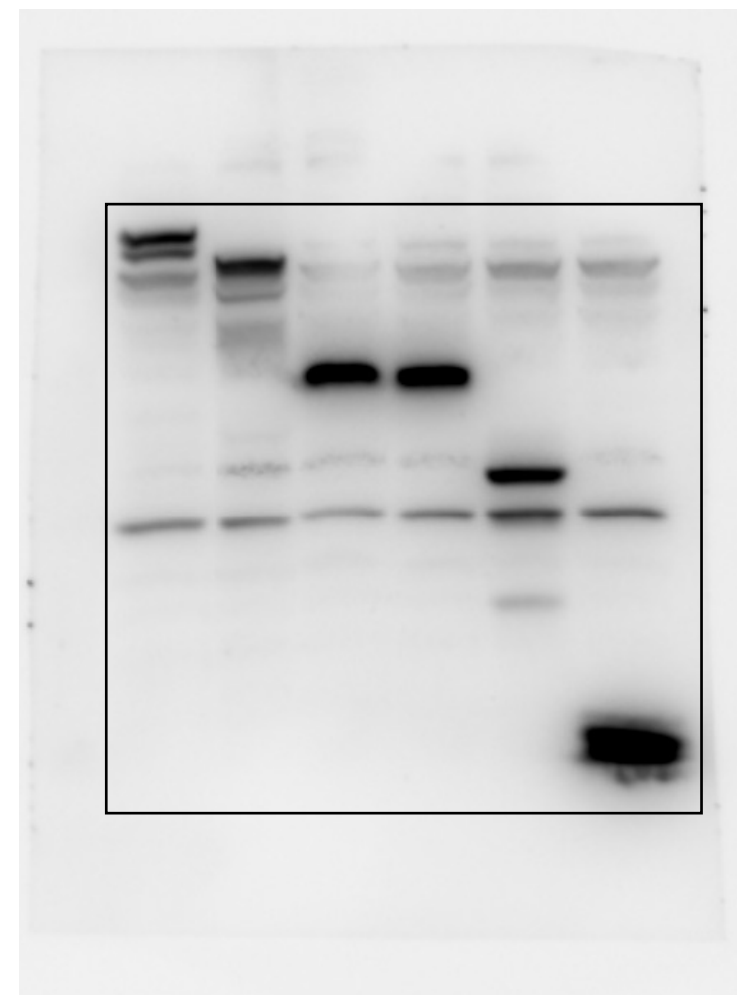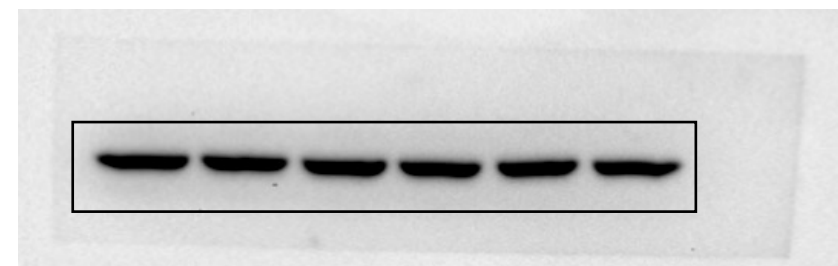

Figure 3

d

PRTN3-HA 28-248  
PRTN3-HA 200-248  
PRTN3-HA 28-200

IP  
HA

IB:FLAG

kDa

70

IB:FLAG

70

WCL

IB:HA

25

Input

15

IB:HA

15

OE

10

$\beta$ -Actin

55

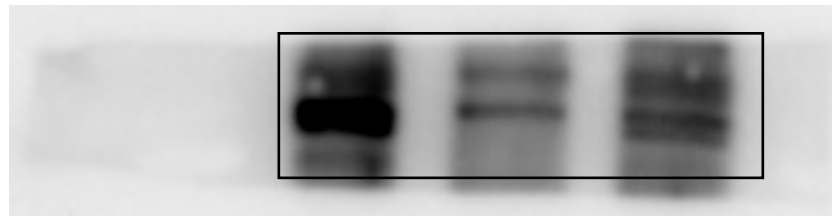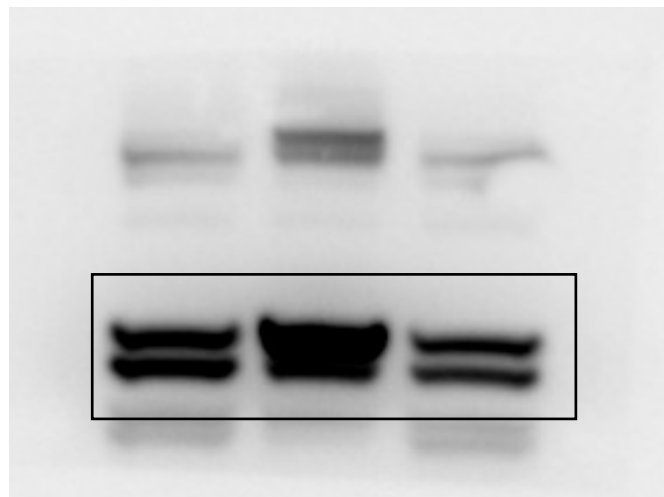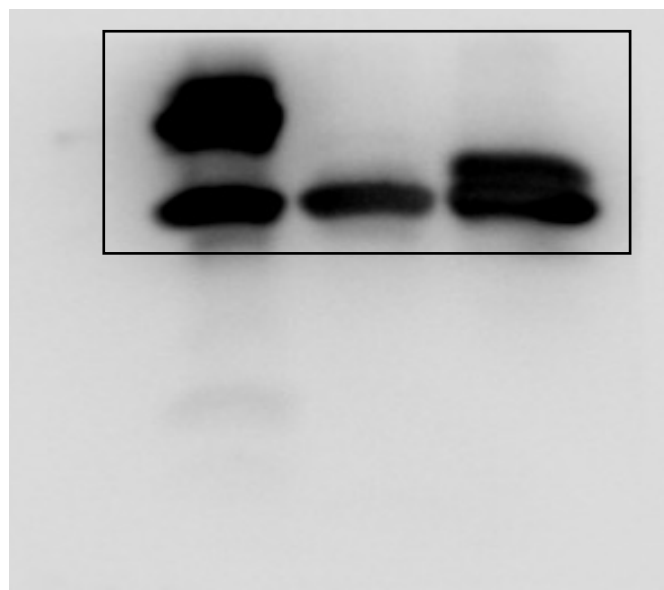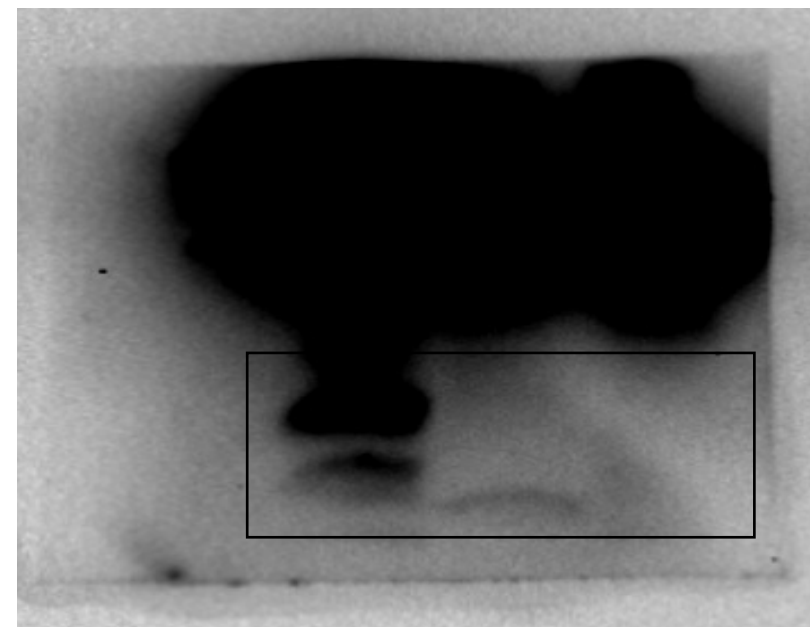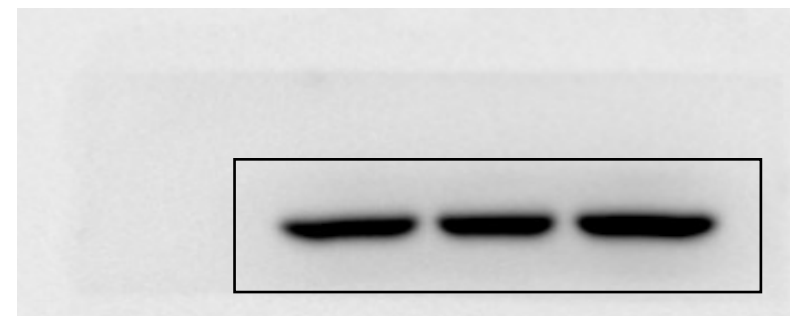



Figure 3

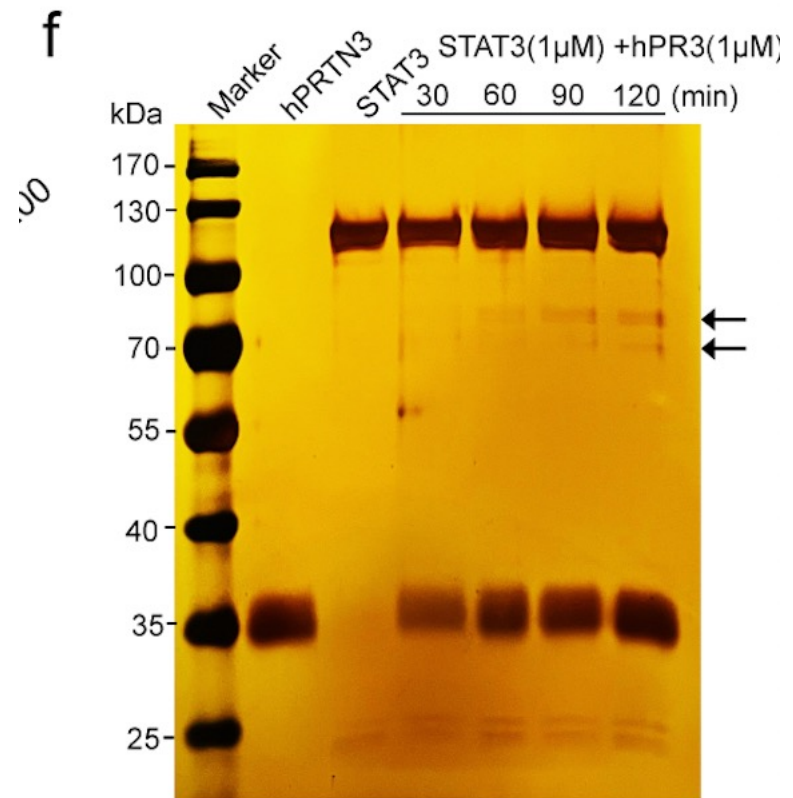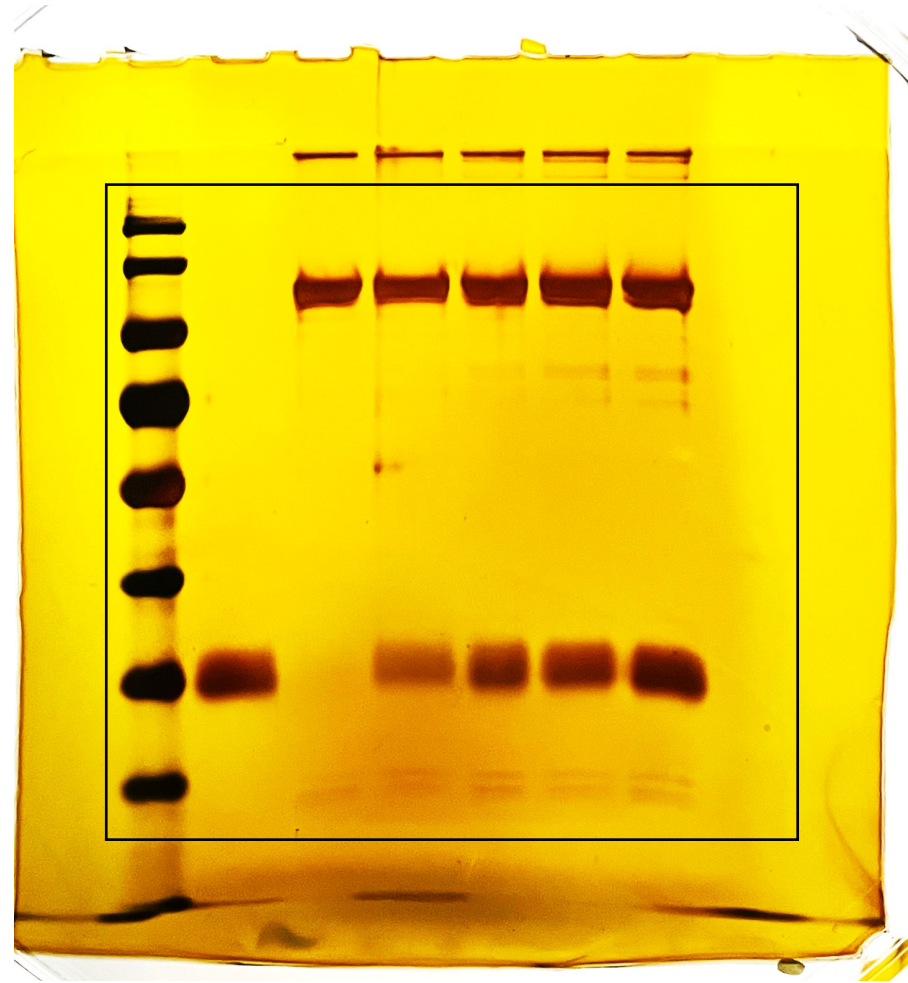

Figure 4

a

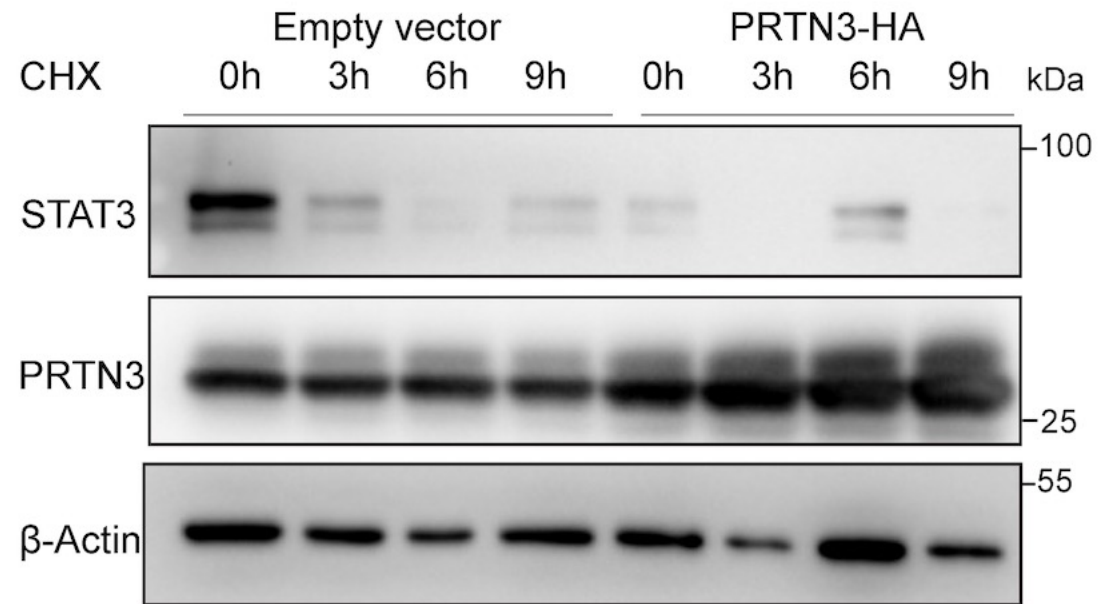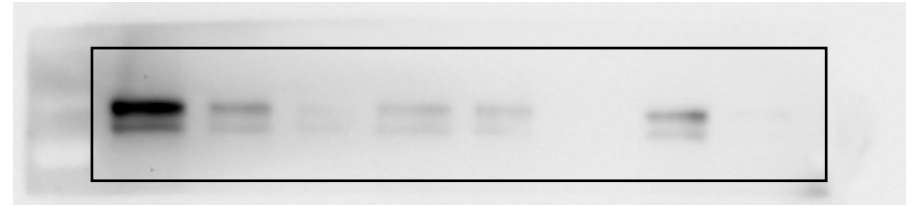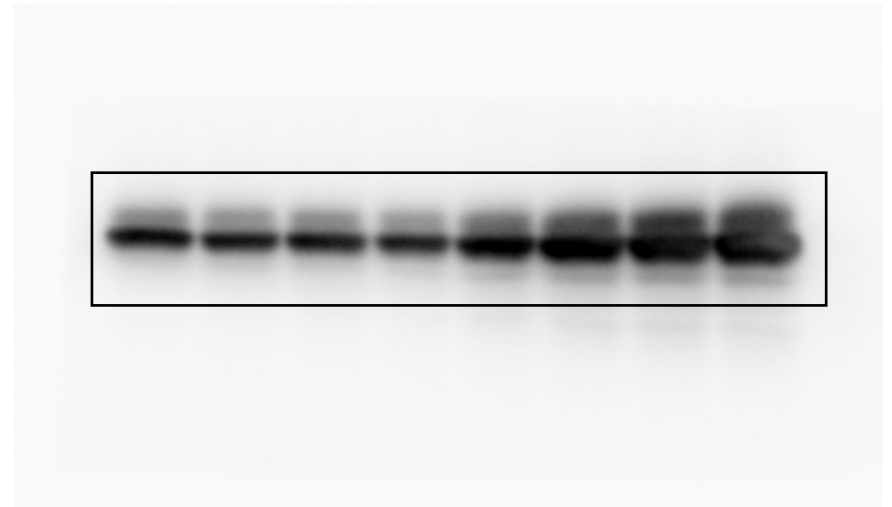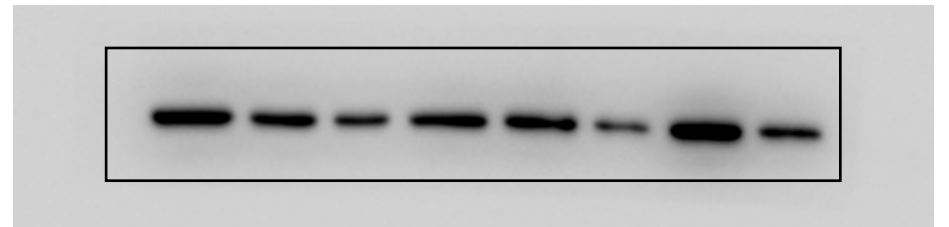

Figure 4

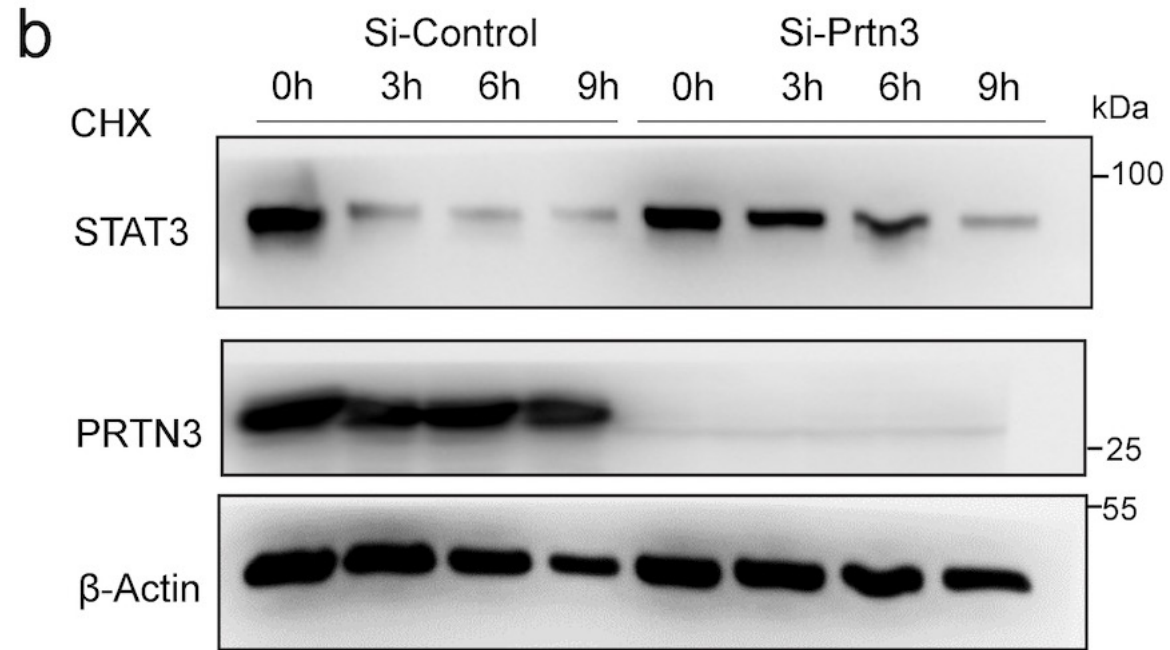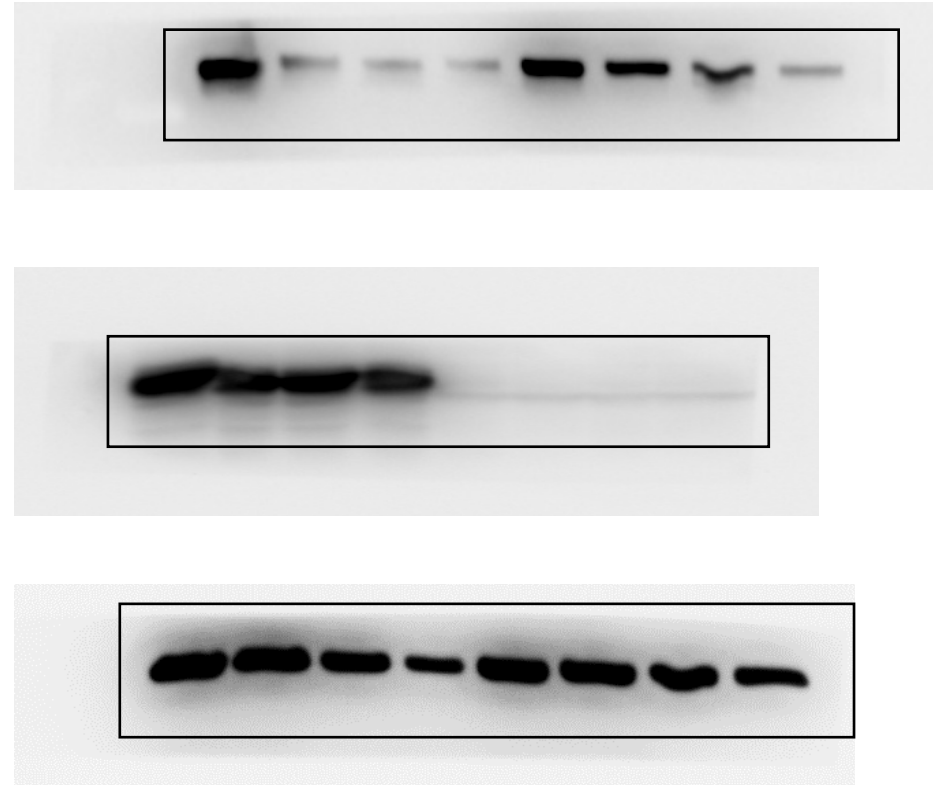

Figure 4

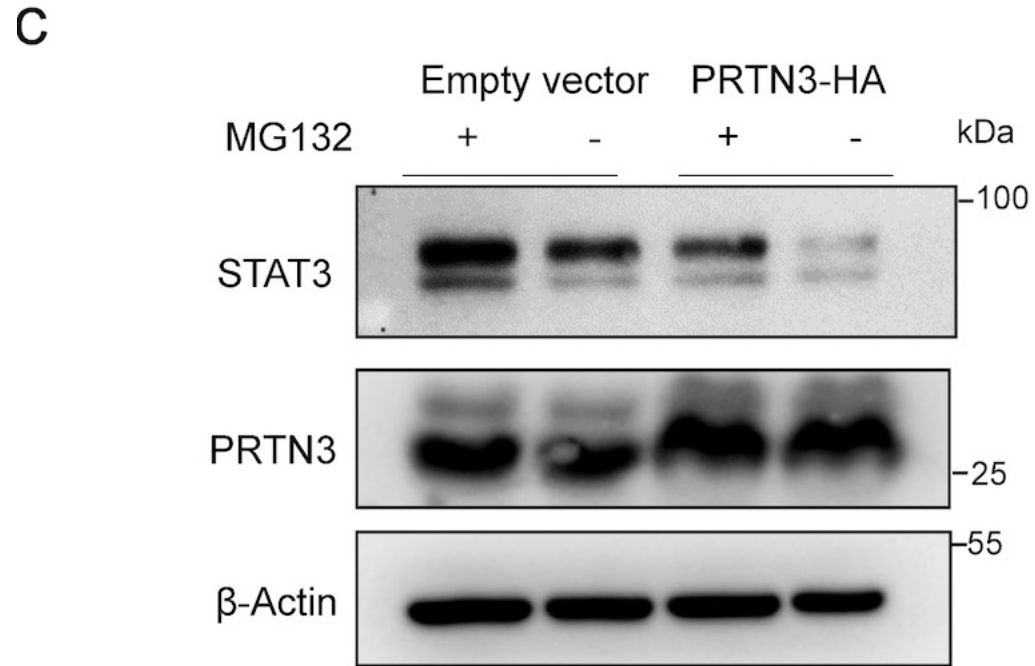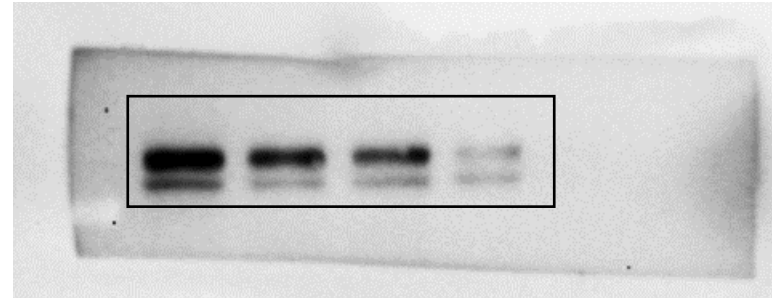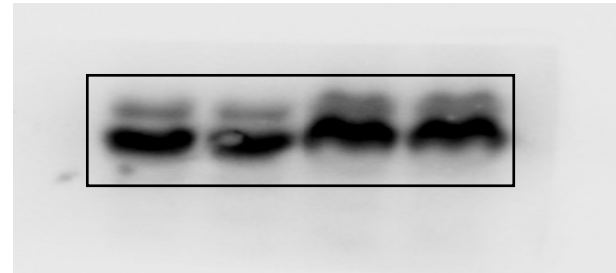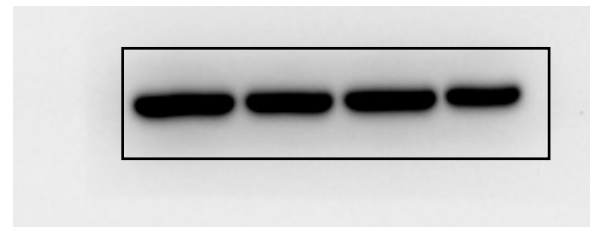

Figure 4

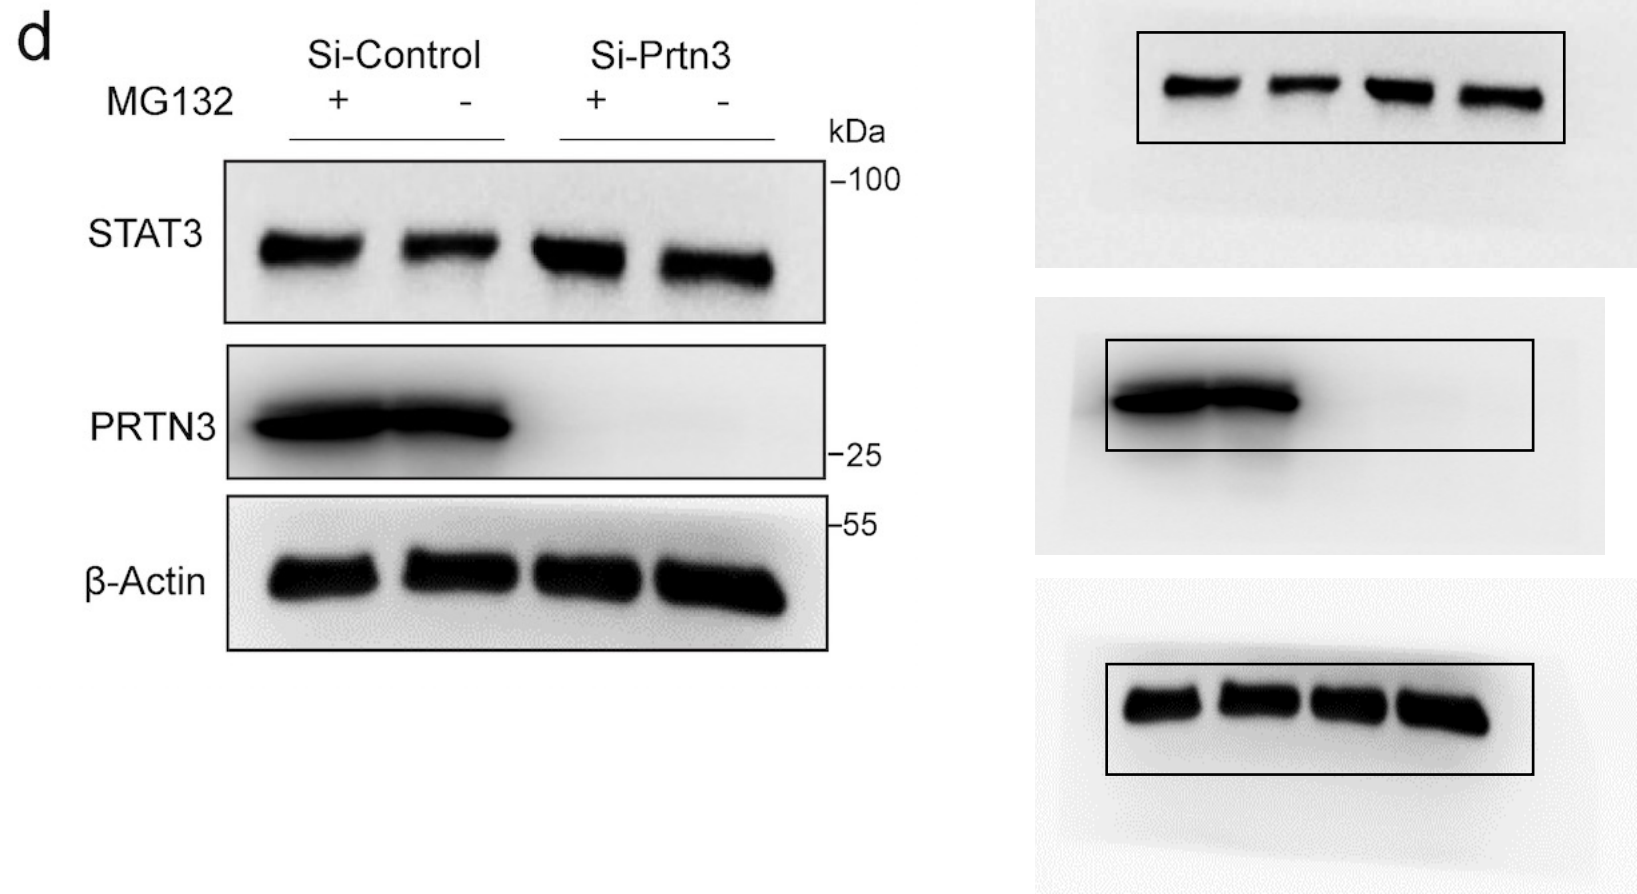

# Figure 4

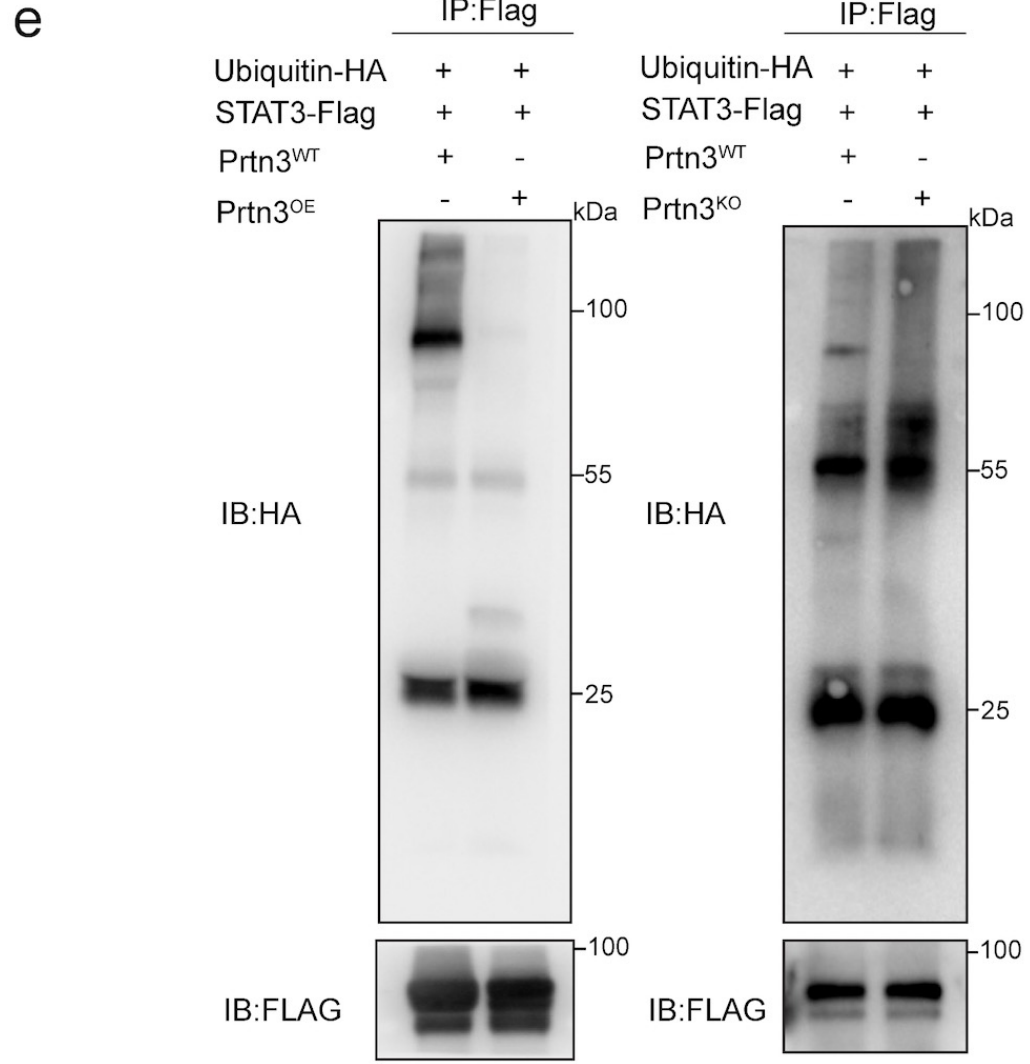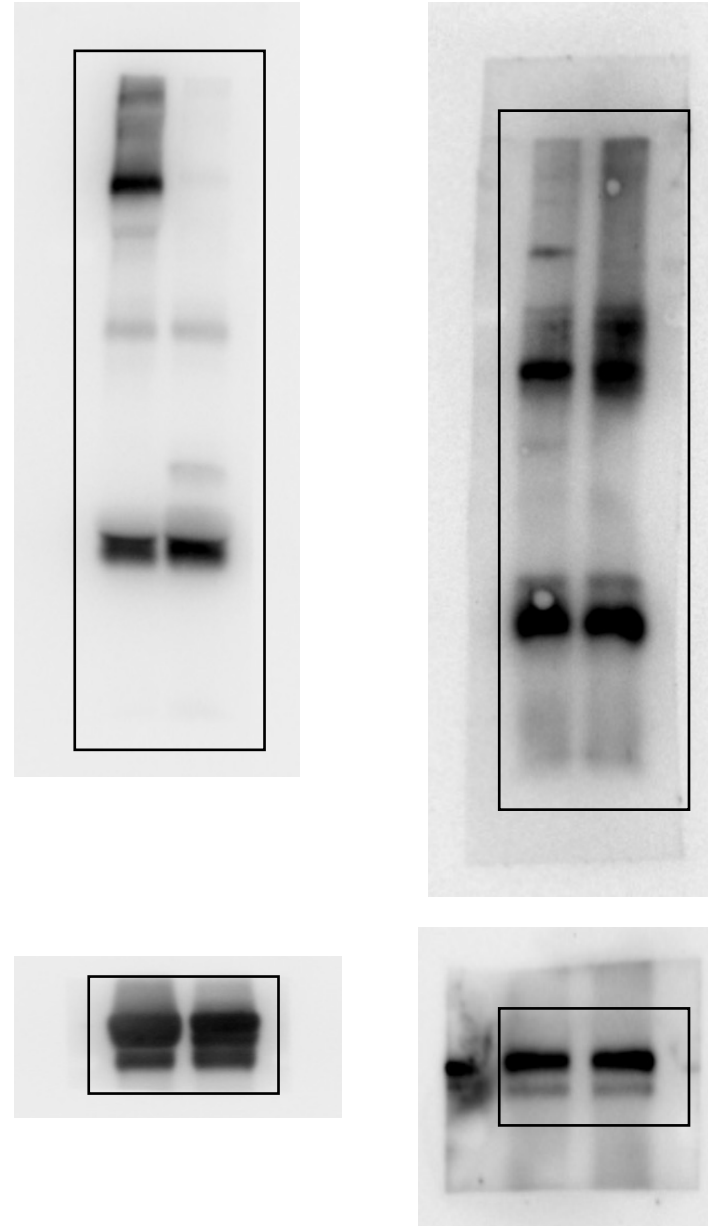

Figure 5

a

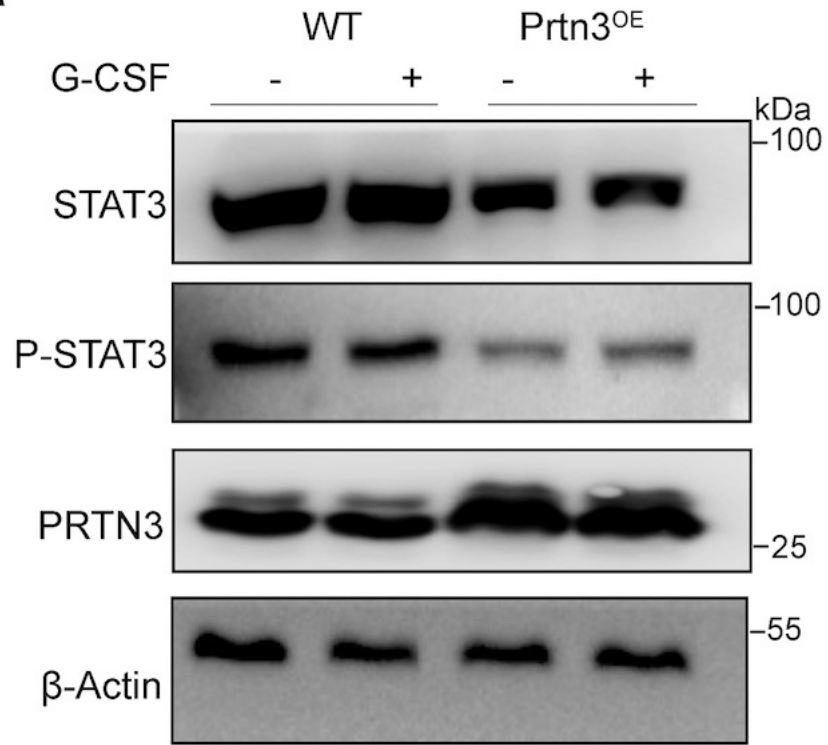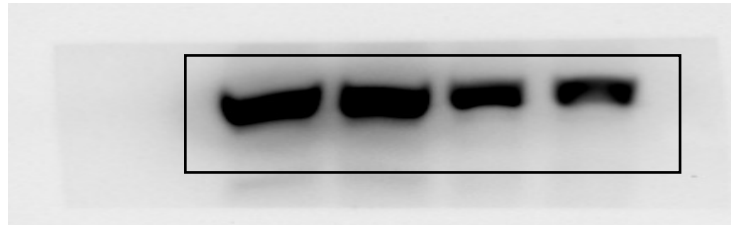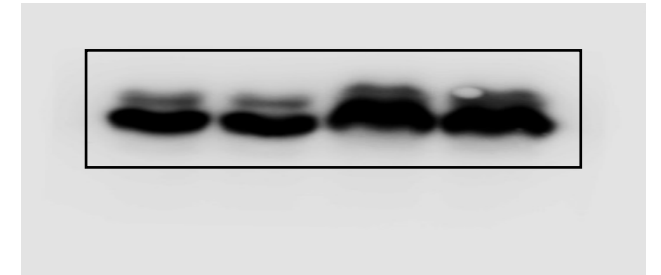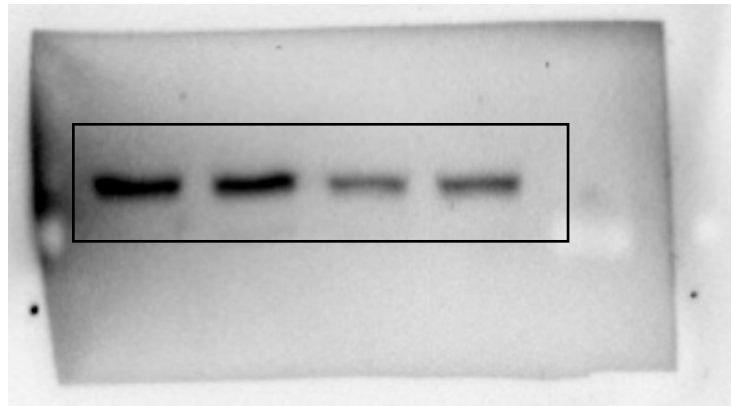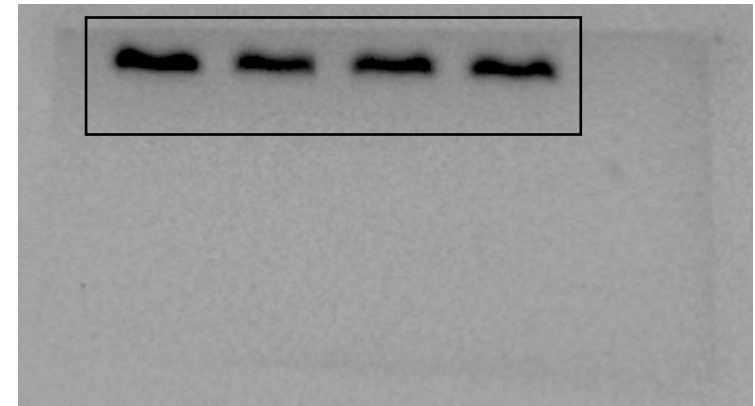

Figure 5

**b**

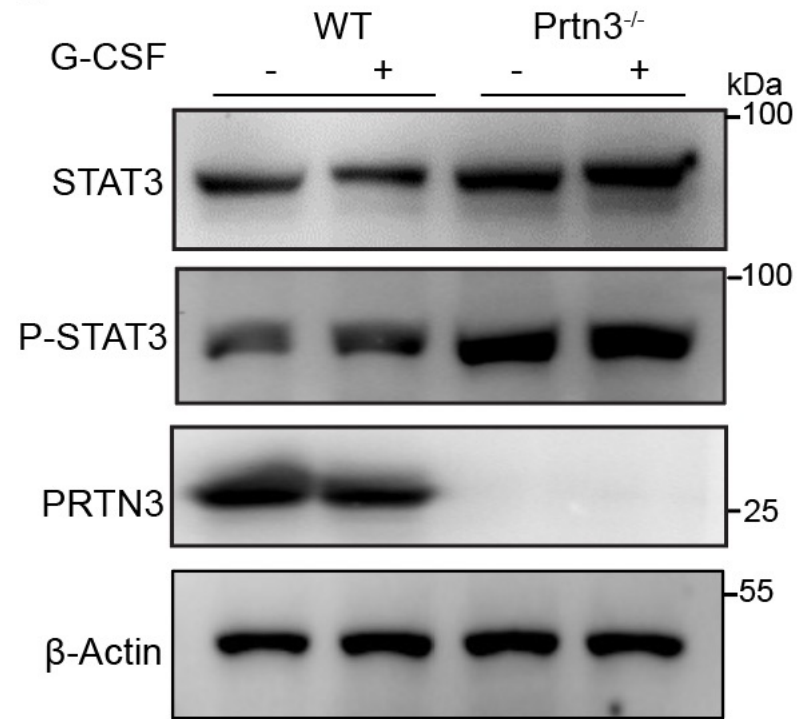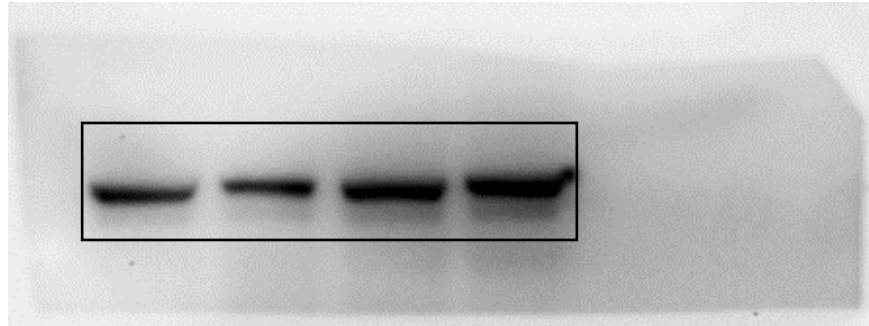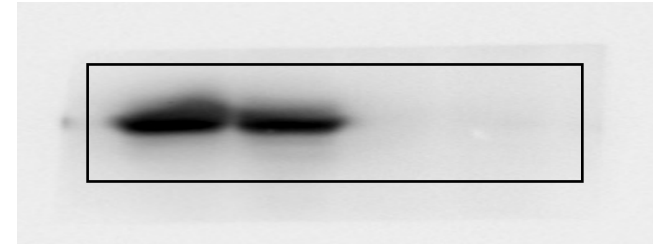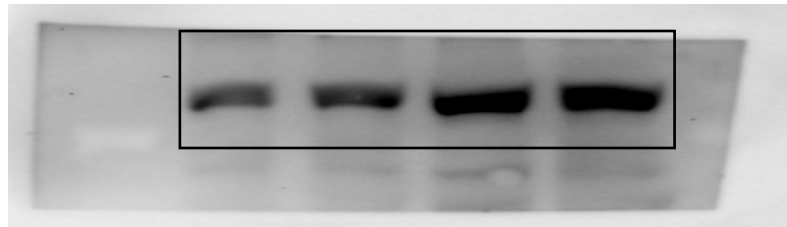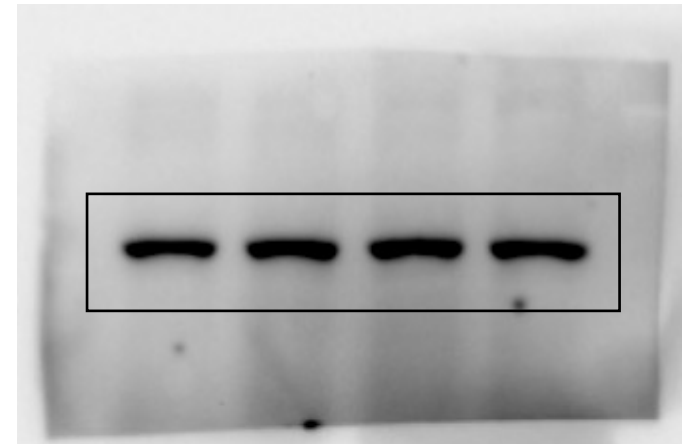



Figure 6

a

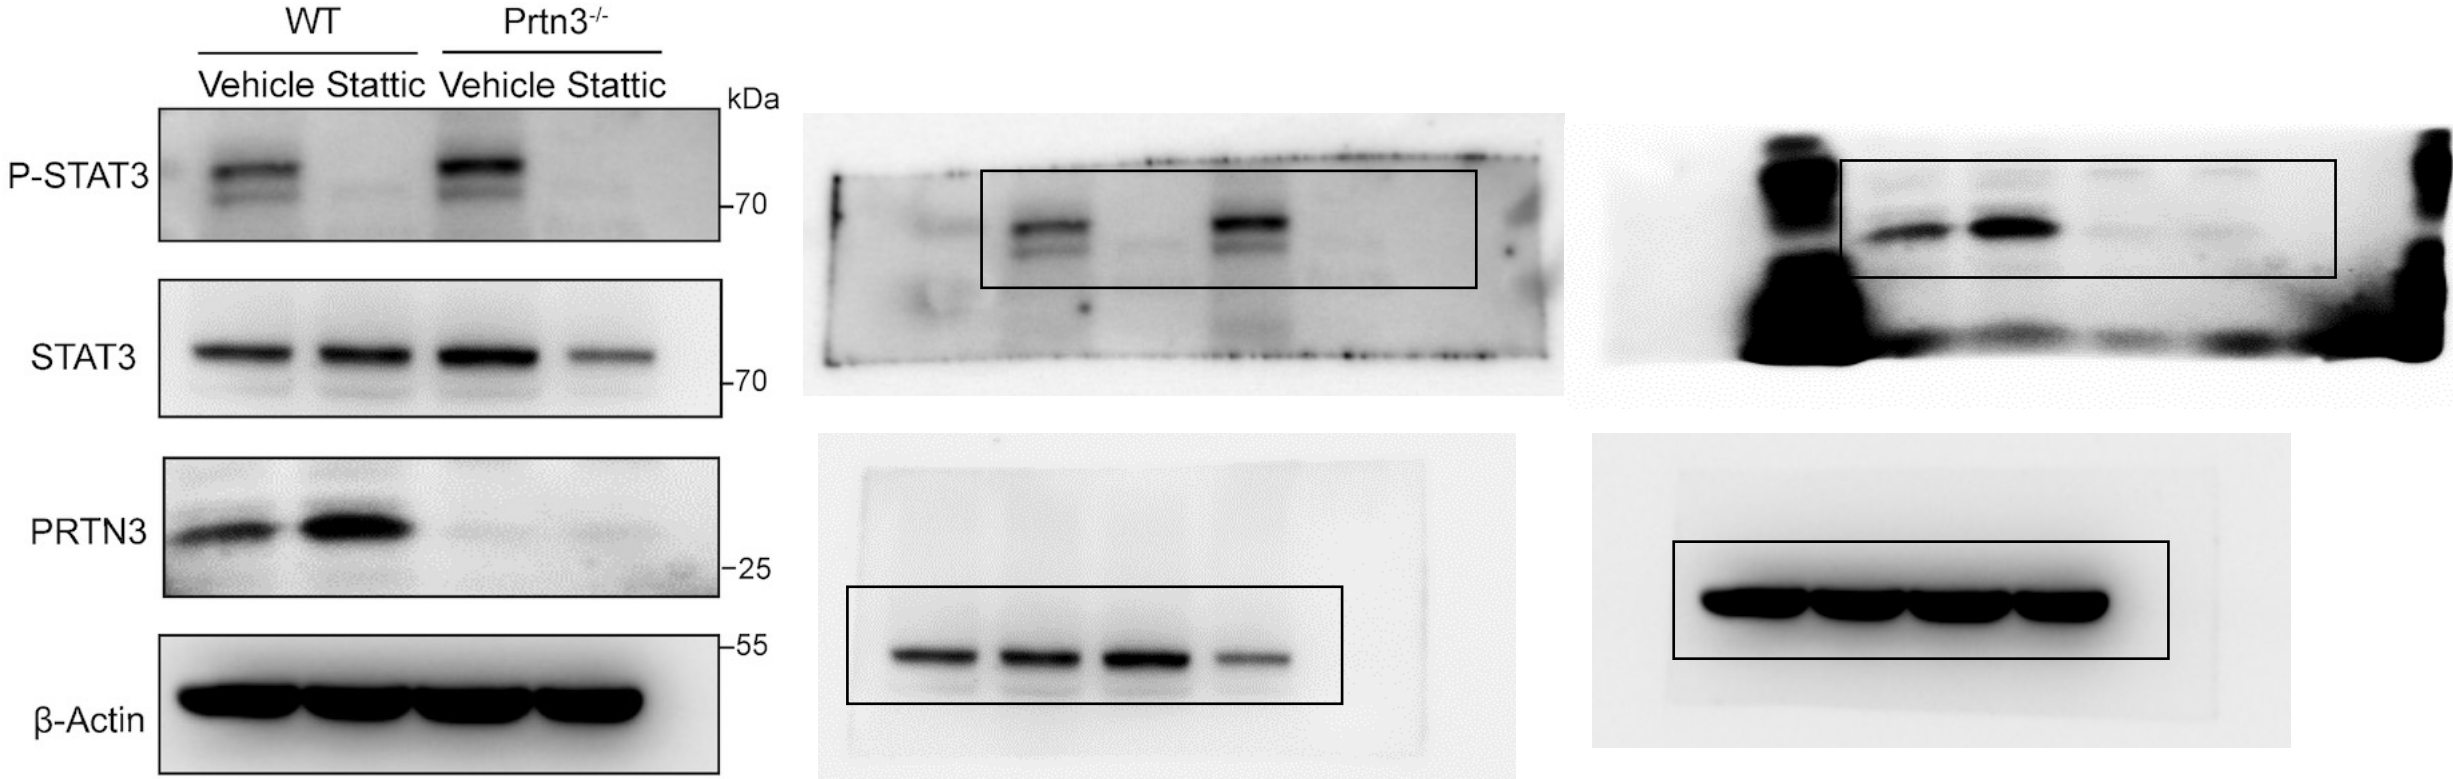

Figure 7

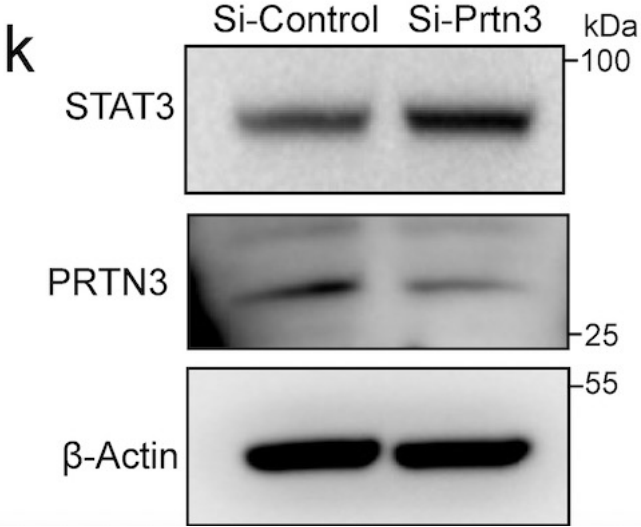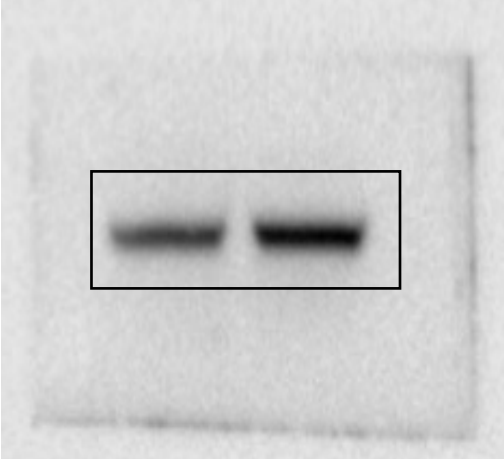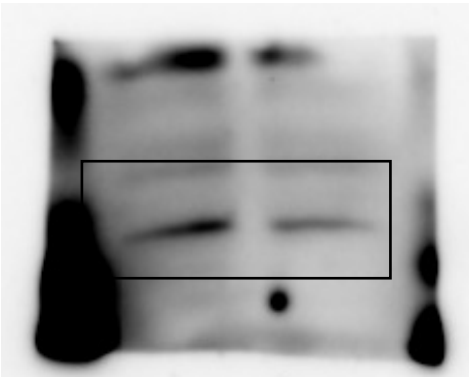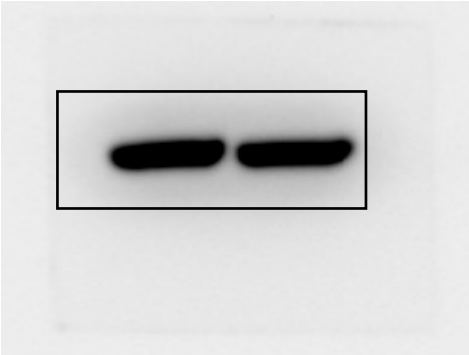

Figure S10

a

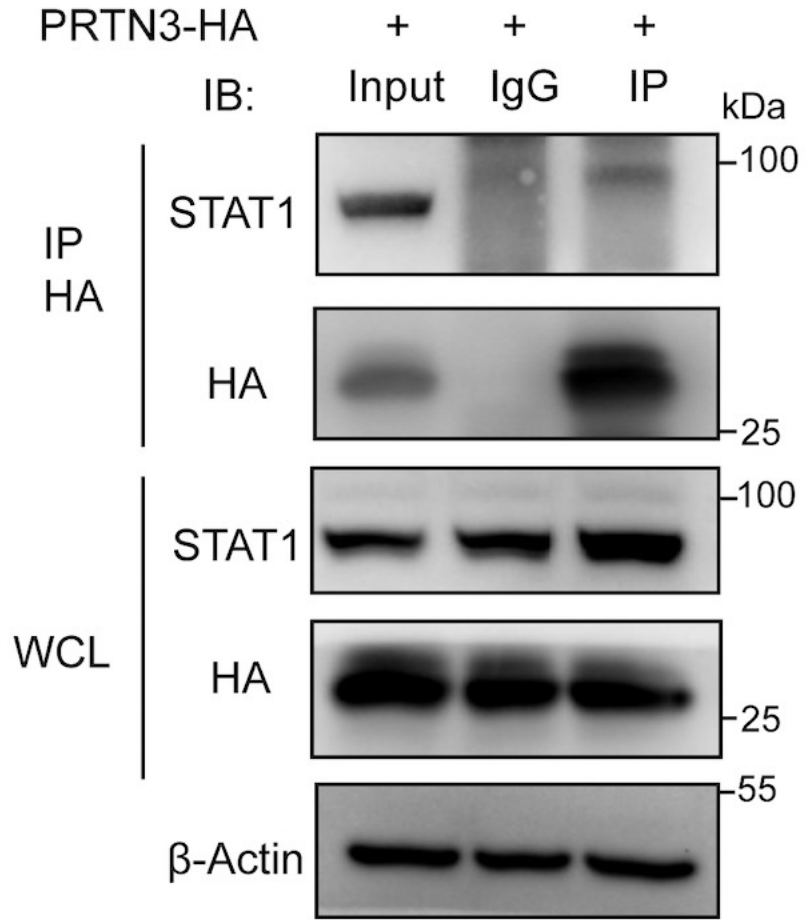

Left

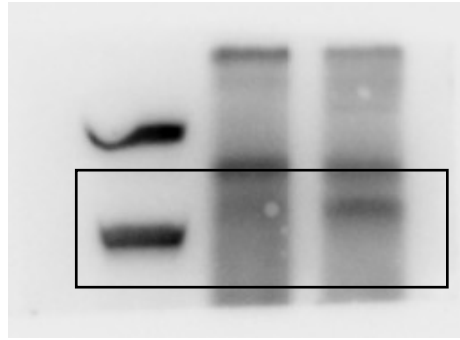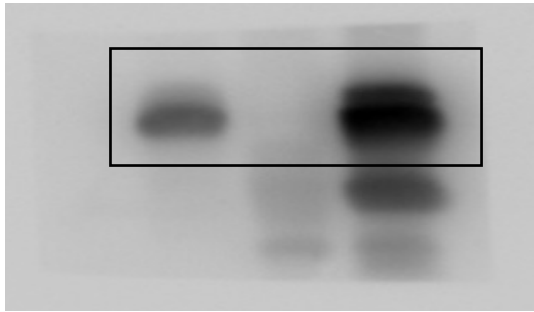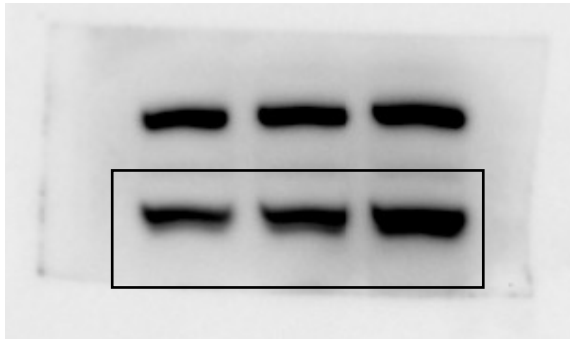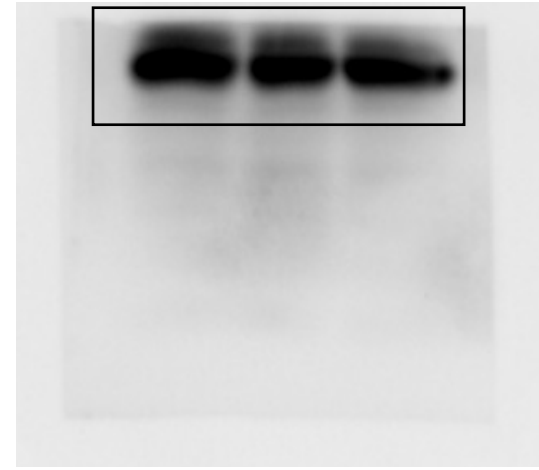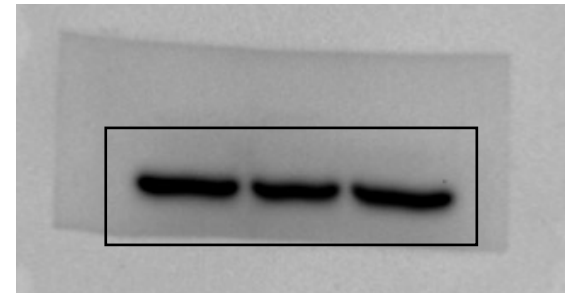

Figure S10 a

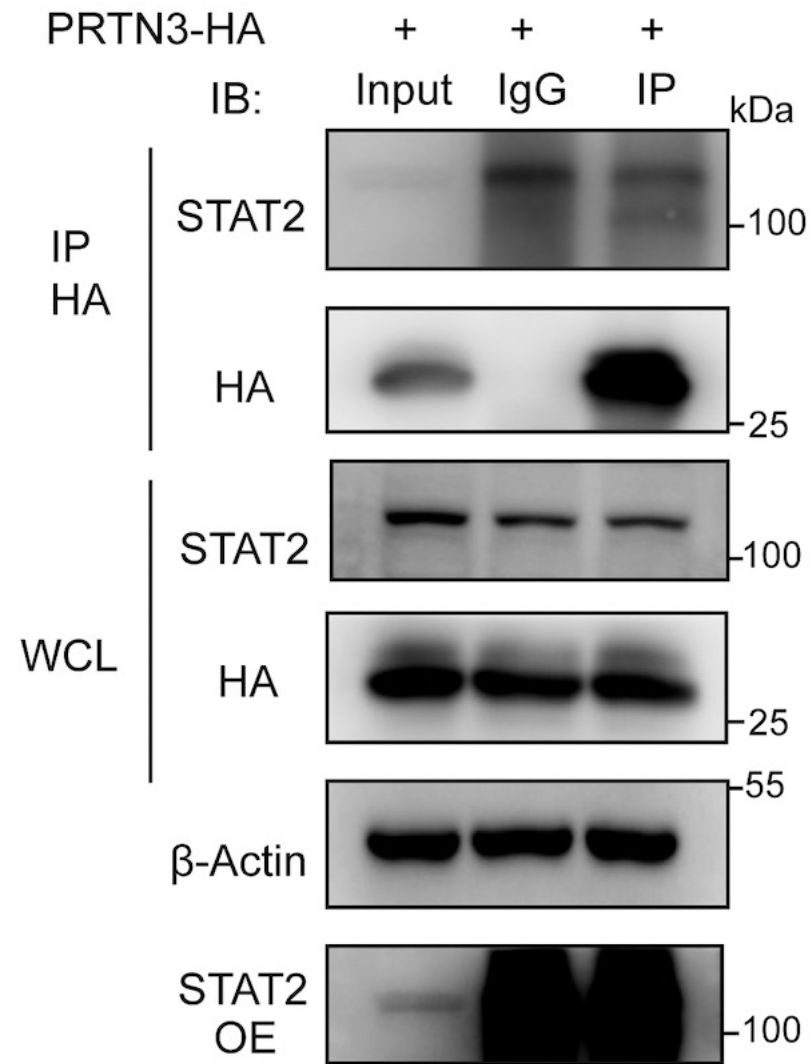

Middle

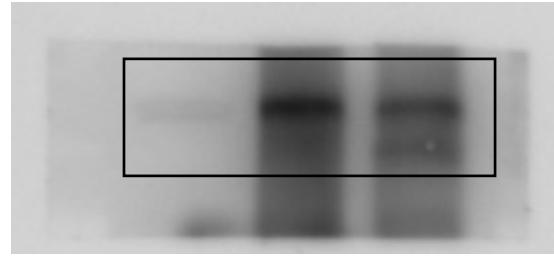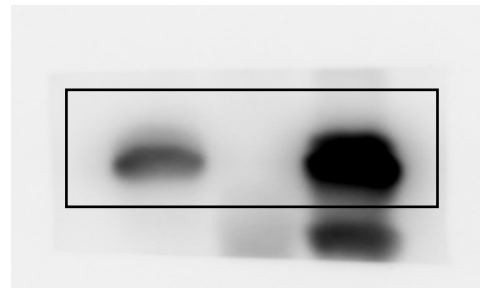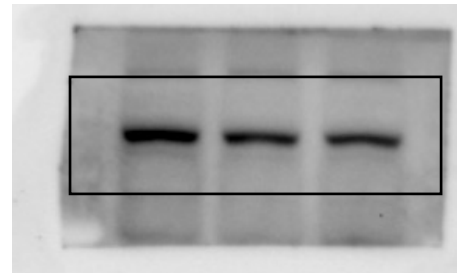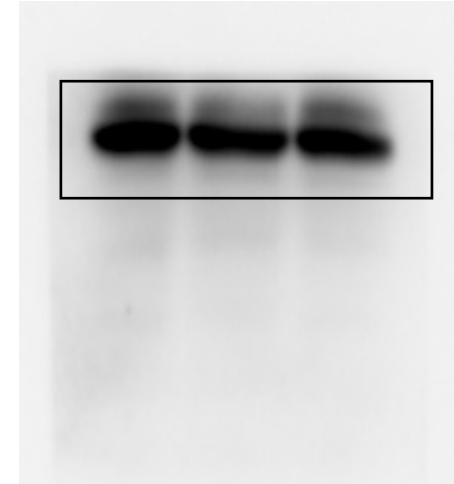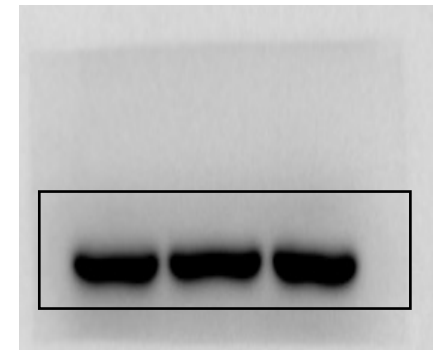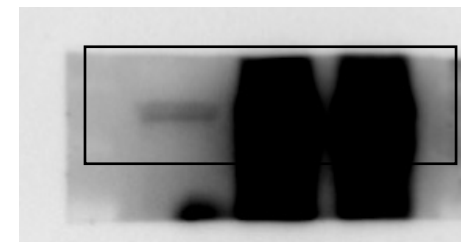

Figure S10 a

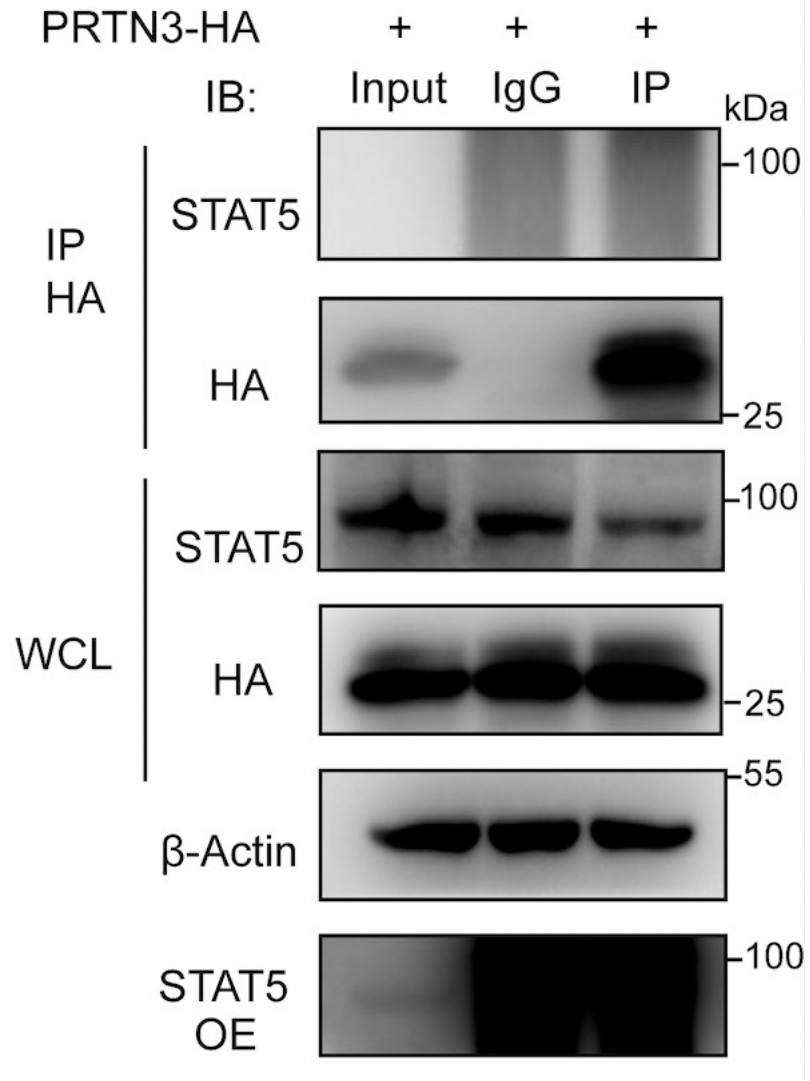

Right

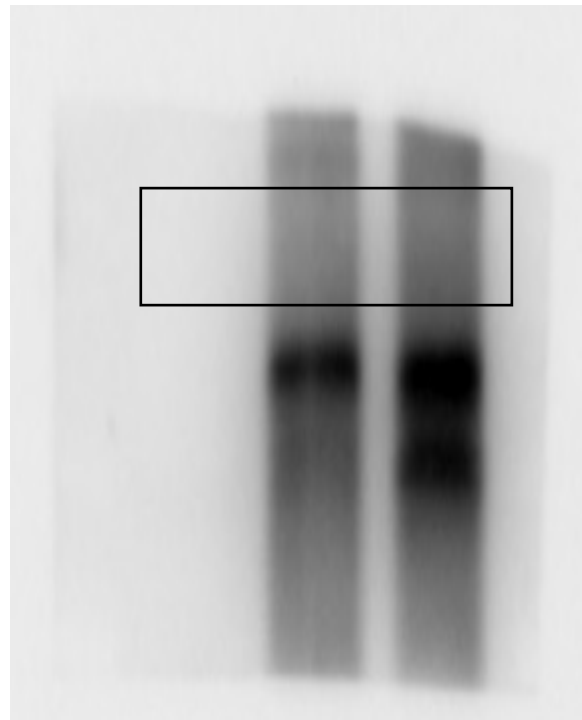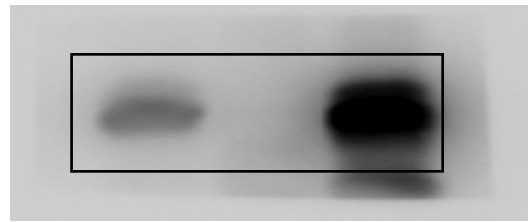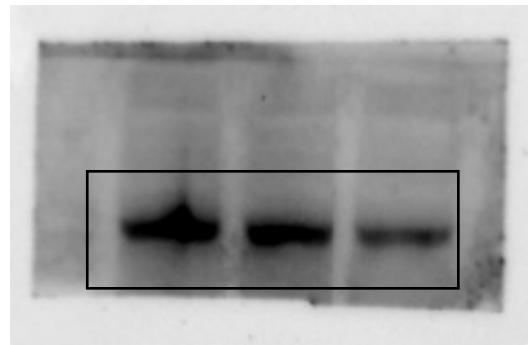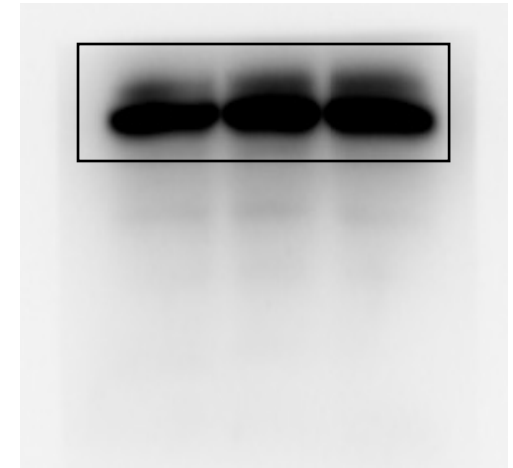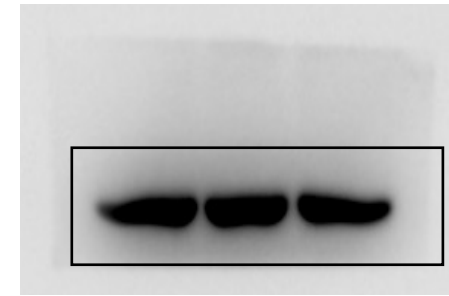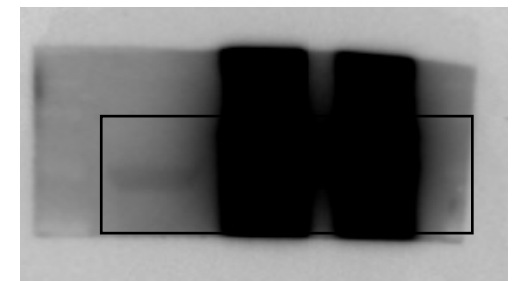

Figure S10

b

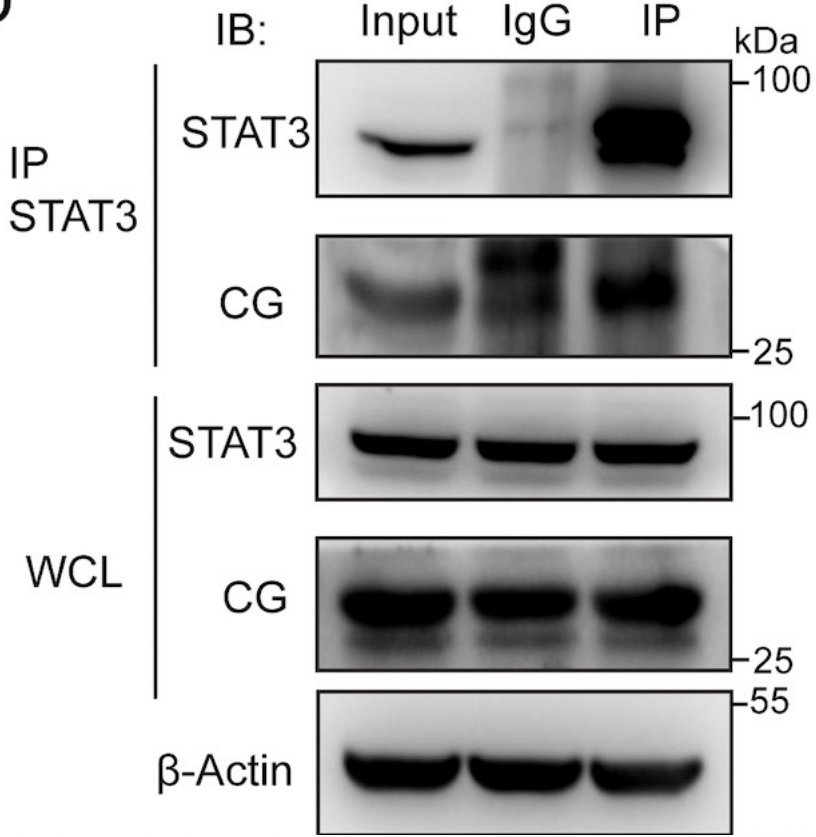

Left

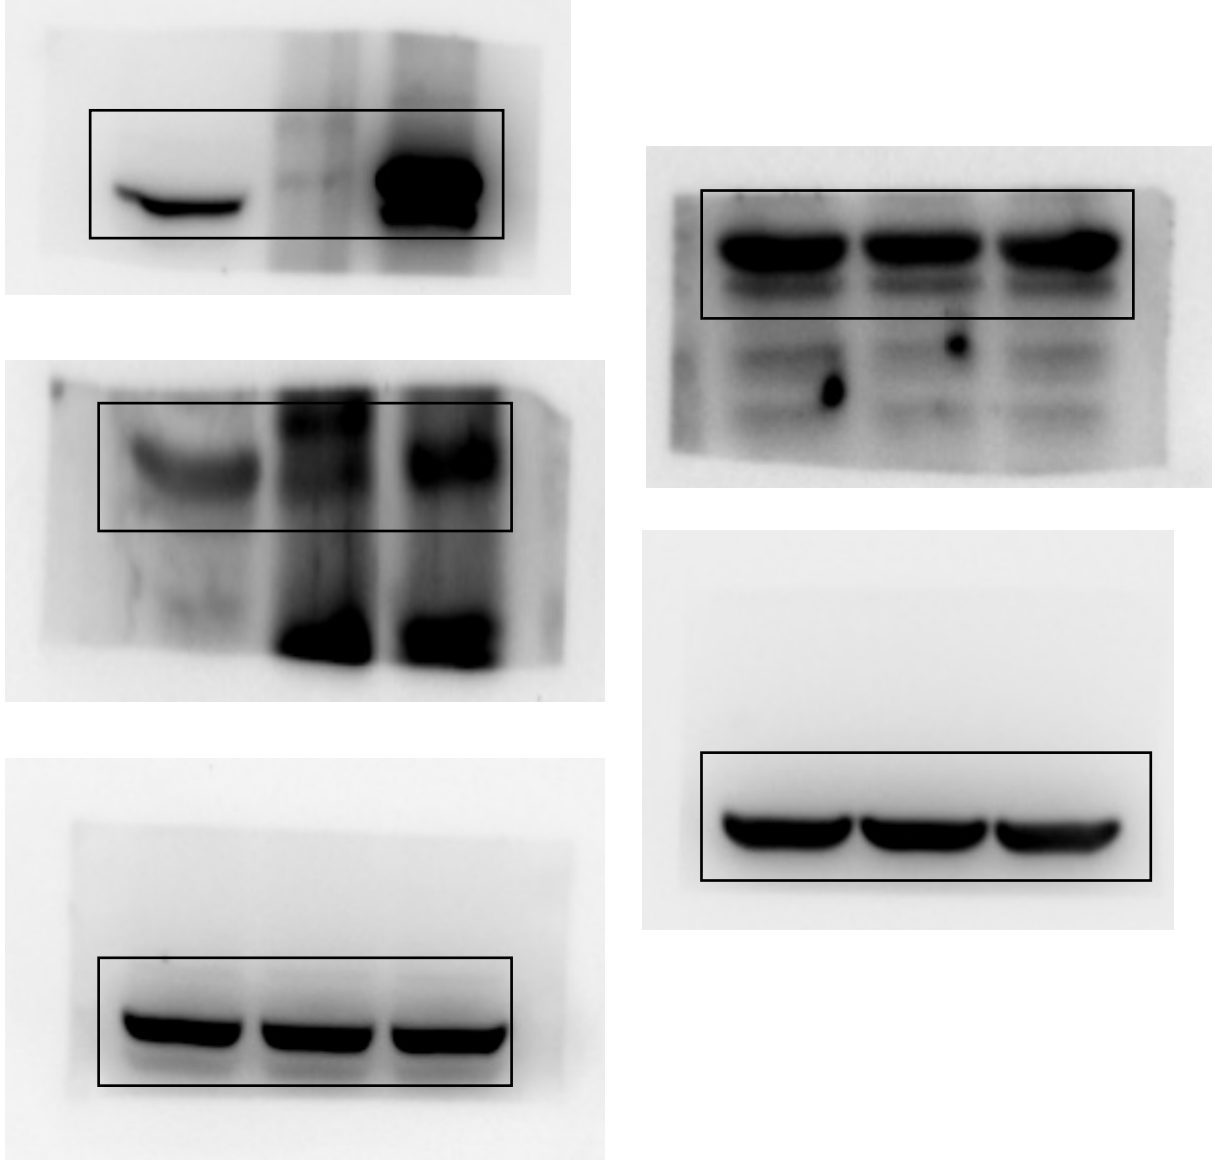

Figure S10 b

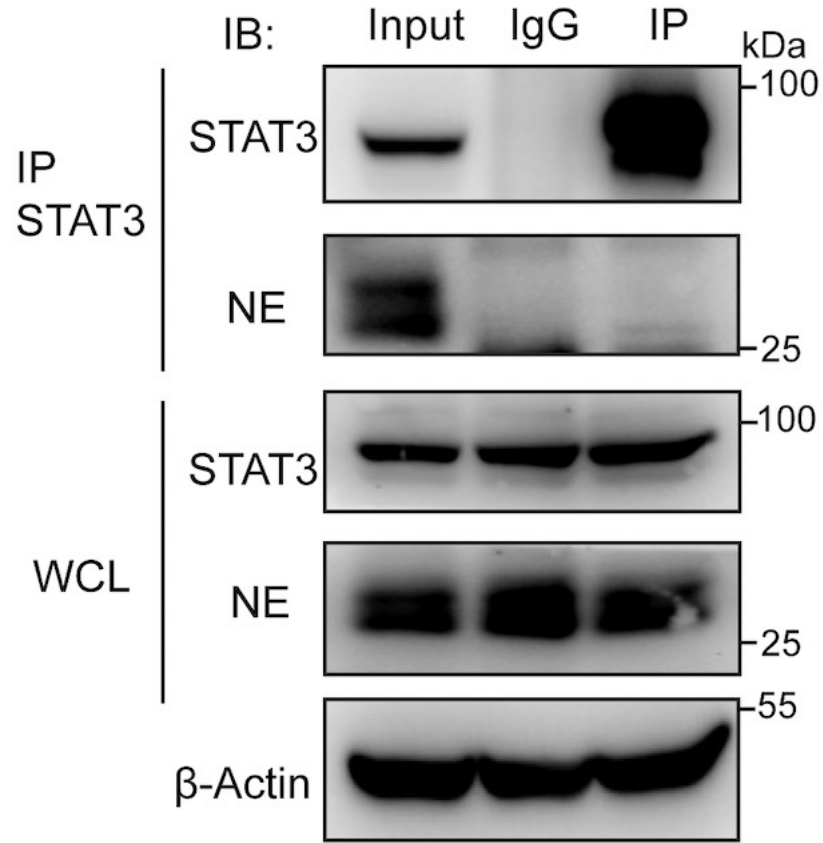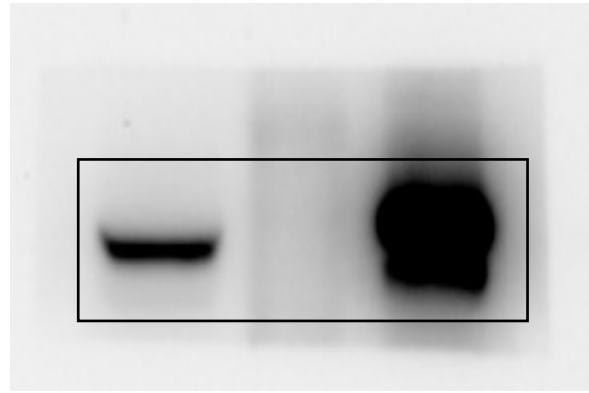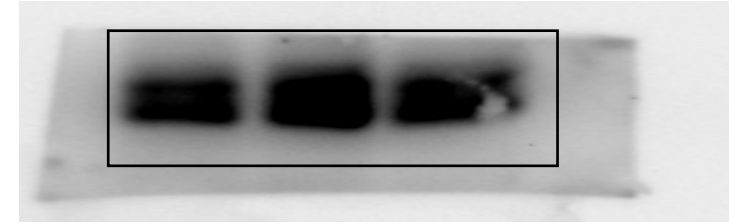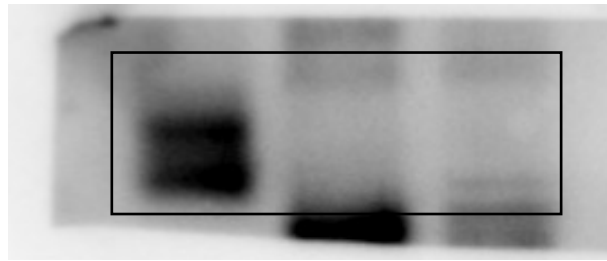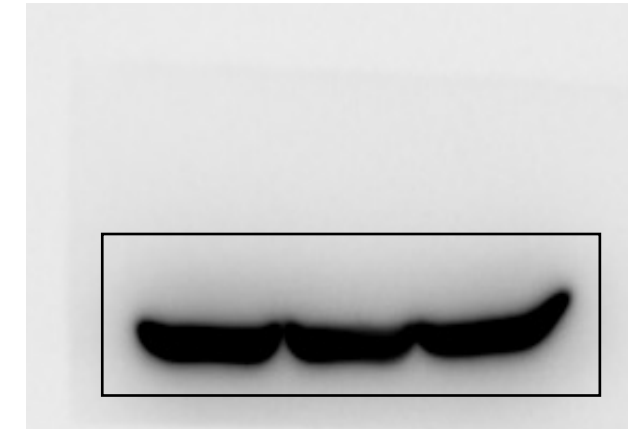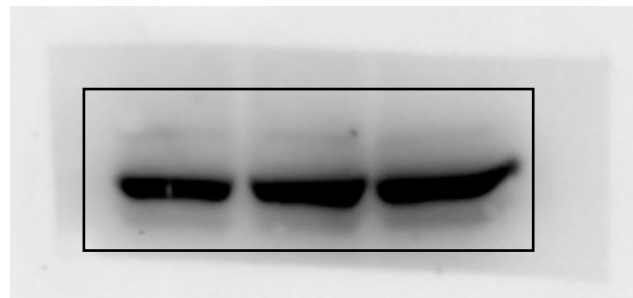

Right

Figure S17

a

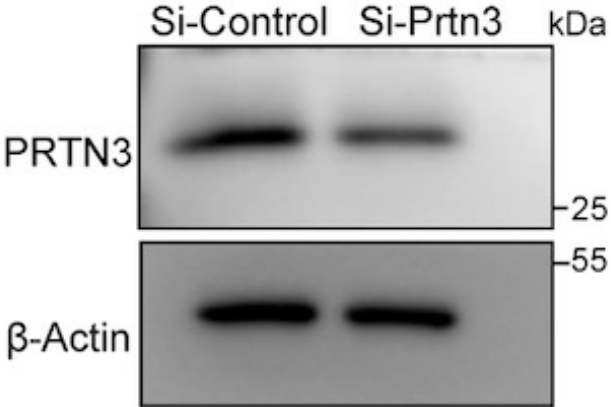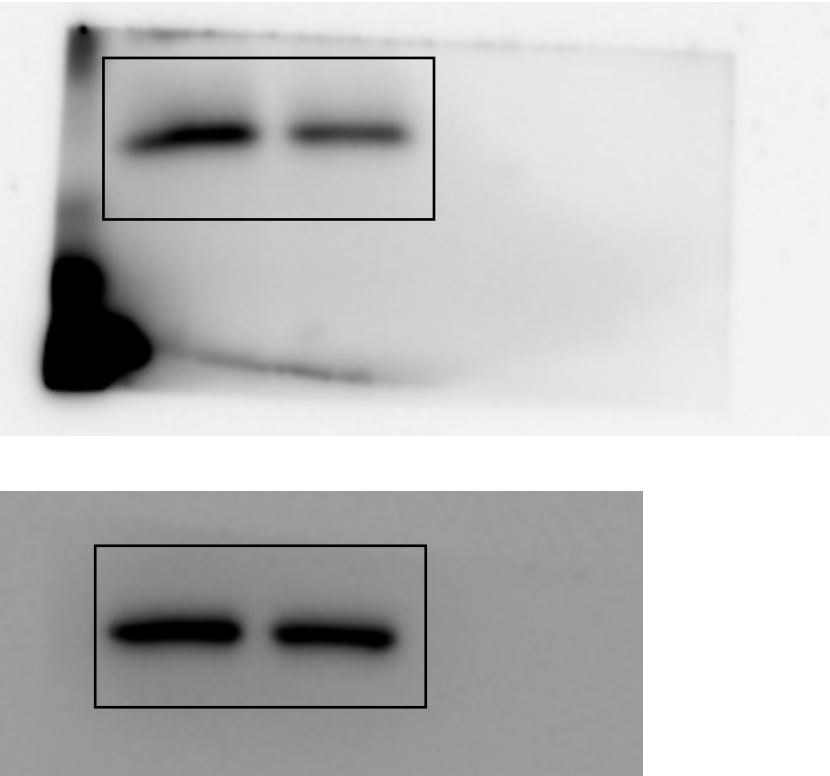



Figure S19

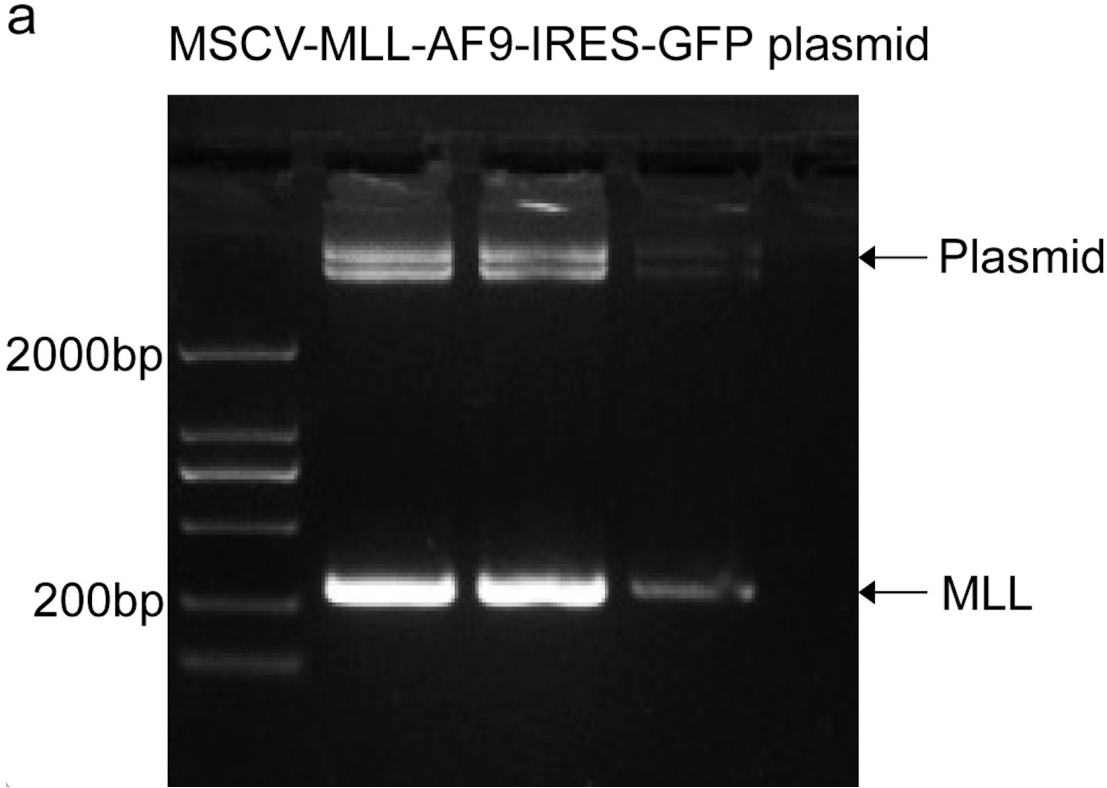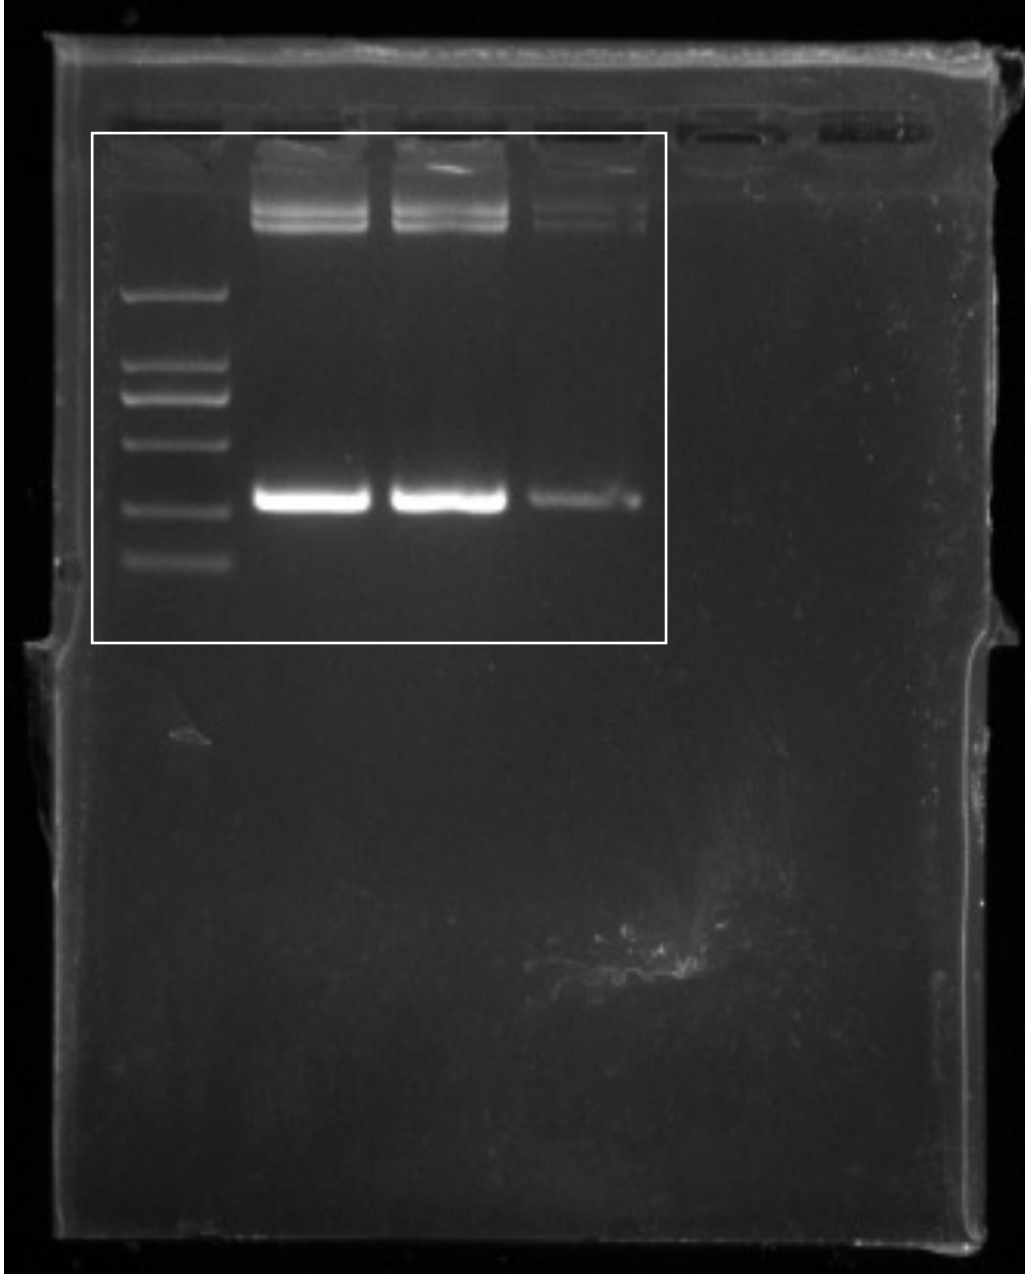

Supplement: 41418_2024_1288_MOESM2_ESM.pdf [file 41418_2024_1288_MOESM2_ESM.pdf]
